## Trefoil factor 3 mediation of oncogenicity and chemoresistance in hepatocellular carcinoma is AKT-BCL-2 dependent

Ming-Liang You<sup>1,\*</sup>, Yi-Jun Chen<sup>1,\*</sup>, Qing-Yun Chong<sup>1</sup>, Ming-Ming Wu<sup>2,3</sup>, Vijay Pandey<sup>1</sup>, Ru-Mei Chen<sup>1</sup>, Liang Liu<sup>4</sup>, Lan Ma<sup>5</sup>, Zheng-Sheng Wu<sup>6</sup>, Tao Zhu<sup>2,3</sup> and Peter E. Lobie<sup>1,5</sup>

<sup>1</sup>Cancer Science Institute of Singapore and Department of Pharmacology, National University of Singapore, Singapore

<sup>2</sup>Hefei National Laboratory for Physical Sciences at Microscale Hefei, Anhui, China

<sup>3</sup>The CAS Key Laboratory of Innate Immunity and Chronic Disease, School of Life Sciences and Medical Center, University of Science and Technology of China, Hefei, Anhui, China

<sup>4</sup>Department of Oncology and Department of Radiology, Fudan University Shanghai Cancer Center, Fudan University, Shanghai, China

<sup>5</sup>Tsinghua Berkeley Shenzhen Institute (TBSI), Shenzhen, China

<sup>6</sup>Department of Pathology, Anhui Medical University, Hefei, Anhui, China

\*These authors have contributed equally to this work

**Correspondence to:** Peter E Lobie, **email:** csipel@nus.edu.sg  
Tao Zhu, **email:** zhut@ustc.edu.cn

**Keywords:** TFF3, hepatocellular carcinoma, oncogenic, chemoresistance, cancer stem cells

**Received:** January 12, 2017

**Accepted:** March 07, 2017

**Published:** April 07, 2017

**Copyright:** You et al. This is an open-access article distributed under the terms of the Creative Commons Attribution License (CC-BY), which permits unrestricted use, distribution, and reproduction in any medium, provided the original author and source are credited.

### ABSTRACT

**The efficacious treatment of hepatocellular carcinoma (HCC) remains a challenge, partially being attributed to intrinsic chemoresistance. Previous reports have observed increased TFF3 expression in HCC. Herein, we investigated the functional role of TFF3 in progression of HCC, and in both intrinsic and acquired chemoresistance. TFF3 expression was observed to be upregulated in HCC and associated with poor clinicopathological features and worse patient survival outcome. Functionally, forced expression of TFF3 in HCC cell lines increased cell proliferation, cell survival, anchorage-independent and 3D matrigel growth, cell invasion and migration, and *in vivo* tumor growth. In contrast, depleted expression of TFF3 decreased the oncogenicity of HCC cells as indicated by the above parameters. Furthermore, forced expression of TFF3 decreased doxorubicin sensitivity of HCC cells, which was attributed to increased doxorubicin efflux and cancer stem cell-like behavior of Hep3B cells. In contrast, depletion of TFF3 increased doxorubicin sensitivity and decreased cancer stem cell-like behavior of Hep3B cells. Correspondingly, TFF3 expression was markedly increased in Hep3B cells with acquired doxorubicin resistance, while the depletion of TFF3 resulted in re-sensitization of the Hep3B cells to doxorubicin. The increased doxorubicin efflux and enhanced cancer stem cell-like behavior of the doxorubicin-resistant Hep3B cells was observed to be dependent on TFF3 expression. In addition, we determined that TFF3-stimulated oncogenicity and chemoresistance in HCC cells was mediated by AKT-dependent expression of BCL-2. Hence, therapeutic inhibition of TFF3 should be considered to hinder HCC progression and overcome intrinsic and acquired chemoresistance in HCC.**

### INTRODUCTION

Hepatocellular carcinoma (HCC) is the predominant primary liver cancer in humans [1]. Despite the incremental improvement in its treatment over the past

few decades, the mortality rate remains high as HCC is generally chemoresistant, and hence current chemotherapy has limited efficacy [2, 3]. An increasing number of studies have revealed the existence of a subpopulation of tumor-initiating cells, known as cancer stem cells

(CSCs) that are responsible for tumor relapse, metastasis and radio/chemoresistance [4–6]. CSCs found in HCC (hepatic CSCs) have been reported to be associated with increased resistance to chemotherapeutic drugs and poor patient survival [7–9]. Increasing evidence has suggested that hepatic CSCs exhibit high expression level of genes involved in anti-apoptosis and drug resistance such as BCL-2 and ATP-binding cassette transporters (ABC transporters) [10, 11]. Hence, the understanding of the basic molecular mechanisms of HCC progression and hepatic CSC functions are essential to develop targeted therapeutics for HCC treatment [12, 13].

Trefoil factor 3 (TFF3) is a member of the trefoil factor family and exerts protective effects against mucosal damage in the gastrointestinal tract. TFF3 has been reported to facilitate cell migration, and inhibit apoptosis and anoikis during mucosal restitution [14]. Recent studies have reported that TFF3 expression is increased during the development and progression of human cancers, including gastric [15], breast [16, 17], colon [18], and prostate carcinomas [19] among others. TFF3 has previously been shown to stimulate survival and proliferation of mammary and prostatic carcinoma cells [16, 20]. In addition, we have previously demonstrated that TFF3 promotes metastasis and angiogenesis in mammary carcinoma [17, 21]. Importantly, increasing evidence has also supported a crucial role of TFF3 in decreasing therapeutic sensitivity and mediating therapeutic resistance. For example, our recent study has revealed that TFF3 reduces the sensitivity of prostate carcinoma cells to ionizing radiation [20]. Furthermore, several studies have also implicated functional involvement of TFF3 in resistance towards tamoxifen and aromatase inhibitors in mammary carcinomas [16, 22]. In contrast, the depletion of TFF3 has previously been shown to enhance the sensitivity of gastric cancer cells to chemotherapeutics, in particular doxorubicin [23]. TFF3 function appears to be mediated by multiple signaling pathways including mitogen-activated protein kinase (MAPK) [24], phosphatidylinositol-3-kinase-AKT (PI3K-AKT) [25, 26], signal transducer and activator of transcription 3 (STAT3) [27] and nuclear factor kappa B (NF- $\kappa$ B) [28]. In addition, BCL-2 is found to be an important downstream mediator of TFF3-stimulated anchorage-independent growth and anti-estrogen resistance in mammary carcinoma cells [16].

Recently, TFF3 expression has been reported to be upregulated in mouse models with spontaneous and carcinogen-induced HCC [29, 30]. TFF3 expression in HCC has also been observed to be associated with higher tumor grade [31, 32]. However, the contribution of TFF3 to the malignant progression of HCC remains unclear [33]. In this study, we report that higher TFF3 expression in HCC patient samples is associated with larger tumor size, advanced tumor grade, and a higher proliferation index as well as a poor patient survival outcome. TFF3 enhances the oncogenic behavior and CSC-like properties of HCC

cells. In addition, TFF3 reduces sensitivity to doxorubicin, while increased TFF3 expression mediates acquired resistance to doxorubicin.

## RESULTS

### High TFF3 expression is associated with poor survival outcome in HCC

In order to assess the clinical relevance of TFF3 expression in HCC patients, we analyzed the expression levels of TFF3 protein in adjacent non-tumor liver specimens (n=110) and HCC specimens (n=138) using immunohistochemistry (IHC). As shown in Figure 1A, higher expression levels of TFF3 protein were observed in HCC specimens, while lower expression levels were detected in the adjacent non-tumor specimens. The percentage of HCC specimens that showed positive TFF3 staining (55.8%) was approximately twice that of adjacent non-tumor liver tissues (28.2%,  $p < 0.01$ , Figure 1B). A positive correlation of TFF3 expression with larger tumor size ( $p < 0.05$ ), advanced tumor stage ( $p < 0.001$ ) and higher labeling of Ki67 (proliferation index) ( $p < 0.001$ ) was observed (Figure 1C). On the other hand, no significant correlation of TFF3 expression was observed with patient age, cirrhosis, Hepatitis B surface antigen (HBsAg) and tumor grade. The association between TFF3 expression and HCC patient survival was assessed by using Kaplan-Meier survival analyses. As shown in Figure 1D, HCC patients with high expression levels of TFF3 exhibited a significantly shorter relapse-free and overall survival (mean and median) compared with patients expressing low levels of TFF3 protein in their tumors ( $p < 0.05$ ). These results indicate a significant correlation between TFF3 expression and poor survival outcome in patients with HCC.

### Forced expression of TFF3 promotes oncogenicity of HCC Cells

TFF3 mRNA and protein expression were determined in 7 HCC cell lines and the LO2 normal liver cell line. TFF3 mRNA and protein expression were observed in four of the cell lines: Huh7, Hep3B, HepG2, and PLC\PRF\5 (Supplementary Figure 1A). Based on these TFF3 expression profiles, Hep3B and Huh7 cell lines with forced expression of TFF3 were generated to investigate the functional consequences of increased TFF3 expression. Semi-quantitative RT-PCR analysis and western blot demonstrated that Hep3B-Vec cells express low levels of endogenous *TFF3* mRNA and protein. Hep3B-TFF3 cells exhibited elevated levels of TFF3 expression compared with the corresponding control Hep3B-Vec cells (Figure 2A).

The effect of TFF3 expression on HCC total cell number was examined over 7 days (Figure 2B). Hep3B-

TFF3 cells exhibited a significantly higher cell number than the corresponding Hep3B-Vec cells in medium supplemented with 10% FBS and in serum-reduced medium (0.2% serum). An increase in cell number can be attributed to an increase in cell proliferation and/or decrease in cell death [34]. HCC cell proliferation was investigated by using BrdU incorporation assay and cell cycle analysis. Hep3B-TFF3 cells exhibited a higher BrdU incorporation compared with Hep3B-Vec cells (Figure 2C). Also, cell cycle analysis recorded an increase in the S-phase fraction in Hep3B-TFF3 cells (33.7 %) compared with Hep3B-Vec cells (23.6 %) (Figure 2D). These results indicate that the increased proliferation in

Hep3B-TFF3 cells is at least in part due to an increase in the entry of cells to the S-phase of cell cycle. In addition, Hoechst 33342 staining (apoptotic nuclei) and Caspase 3/7 activity were measured to determine cell apoptosis in Hep3B-TFF3 and Hep3B-Vec cells. Caspase 3/7 has been shown to initiate apoptotic DNA fragmentation, which is a reliable indicator for cell apoptosis [35]. In serum-depleted conditions, forced expression of TFF3 significantly decreased apoptotic cell death in Hep3B cells, as indicated by less apoptotic nuclei in Hep3B-TFF3 cells compared with Hep3B-Vec cells (Figure 2E,  $p < 0.05$ ). These observations were consistent with the results obtained by measuring caspase 3/7 activity, which was

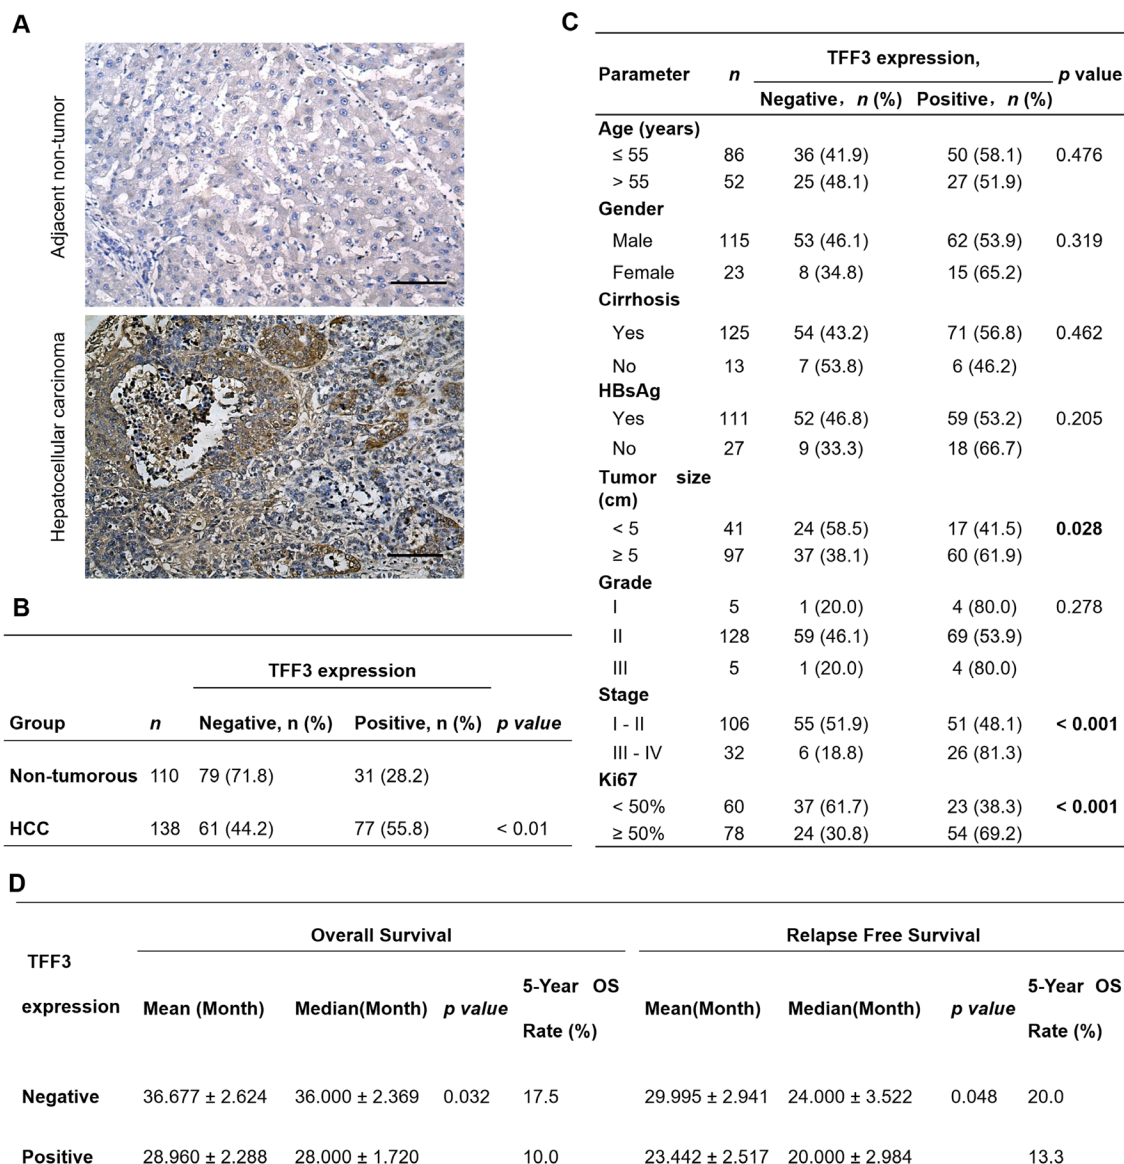

**Figure 1: TFF3 expression correlates with poorer prognosis in HCC patients.** (A) IHC staining of TFF3 in adjacent non-tumor tissue and HCC specimens. Brown color indicates TFF3 staining. All samples were counterstained with hematoxylin and images were captured at × 100 magnification. (B) Statistical analysis of TFF3 expression in HCC and adjacent non-tumor tissue specimens. (C) Association of TFF3 expression with clinicopathological features in HCC patients. (D) Analysis of the significance of TFF3 expression on RFS and OS in HCC patients. OS: Overall survival; RFS: Relapse free survival.

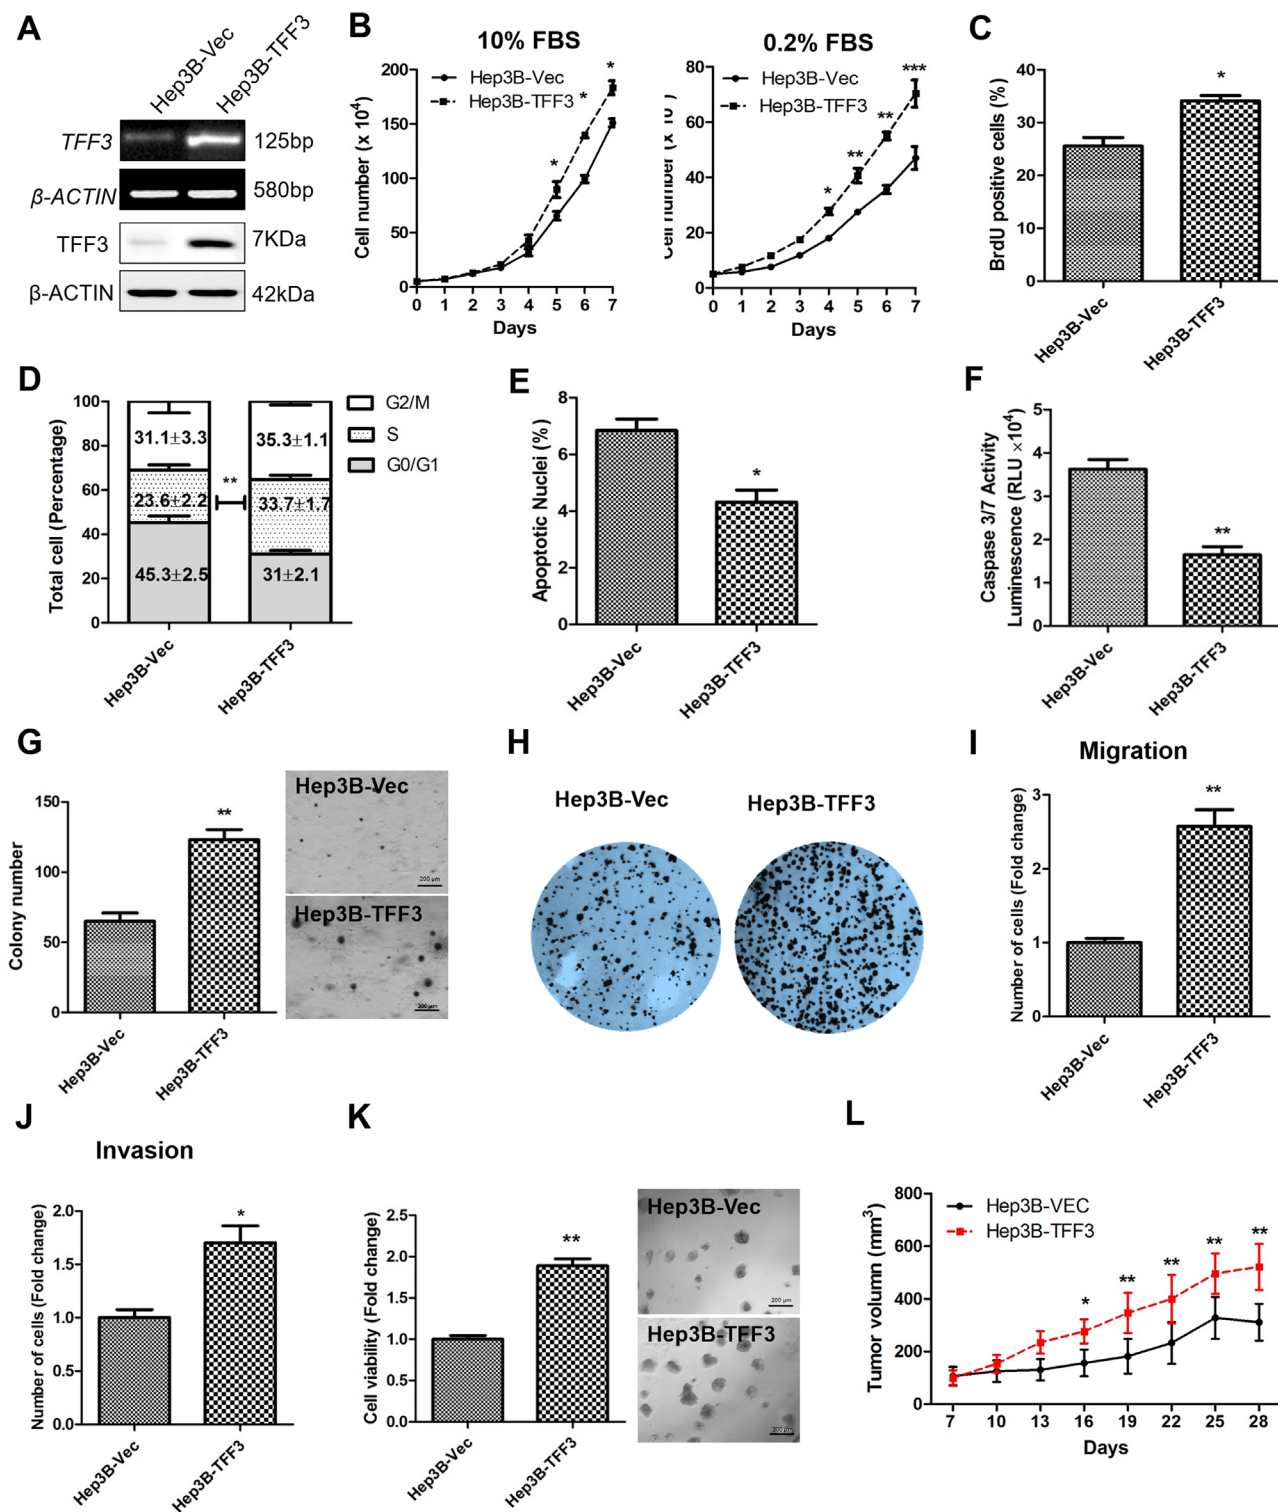

**Figure 2: Forced expression of TFF3 promotes oncogenicity in Hep3B cells.** Hep3B cells were stably transfected with an expression vector containing the TFF3 gene (designated Hep3B-TFF3) or pIRESneo3 vector alone (Hep3B-Vec). (A) Detection of TFF3 expression with RT-PCR and western blot,  $\beta$ -ACTIN was used as input control. (B) Total cell number counting in DMEM media supplemented with 10% or 0.2% FBS over 7 days. (C) BrdU incorporation assay. (D) Cell cycle analysis. (E) Apoptosis assay. Percentage of apoptotic nuclei after 24h serum deprivation are shown in the histogram. (F) Caspase 3/7 activity after 24h serum deprivation. (G) Soft agar colony formation. Colony numbers are shown in the histogram. (H) Foci formation. (I) Cell migration assay. (J) Cell invasion assay. Number of cells penetrating the transwell membrane. (K) 3D Matrigel growth. Cell viability is shown in the histogram. (L) *in vivo* tumor formation. Tumor volumes were measured every 3 days until 6 weeks. Data were expressed as mean  $\pm$  S.E.M. \*,  $p < 0.05$ ; \*\*,  $p < 0.01$ ; and \*\*\*,  $p < 0.001$ .

significantly reduced in Hep3B-TFF3 cells (Figure 2F,  $p < 0.05$ ). Thus, besides promoting cell proliferation, TFF3 also functions as a survival factor in HCC cells.

During the process of oncogenesis, cells acquire the capability of growing in an anchorage-independent manner and resisting to anoikis [36]. In order to examine and assess this feature of oncogenic transformation *in vitro*, cancer cells were cultured in semi-solid soft agar that prevents cells from attaching to substrate. It was observed that forced expression of TFF3 dramatically increased cell anchorage-independent growth as shown in Figure 2G, whereby Hep3B-TFF3 cells formed larger and more cell colonies in soft agar compared with Hep3B-Vec cells. Furthermore, in the foci formation assay, Hep3B-TFF3 cells formed a greater number of colonies with increased size (Figure 2H), suggesting that forced expression of TFF3 increases the capacity for foci formation in Hep3B cells.

We also examined the migratory and invasive potentials of TFF3 using Transwell assays. Forced expression of TFF3 in Hep3B cells exhibited an approximate 2.5 fold increase in cell migration (Figure 2I). In addition, Hep3B-TFF3 cells demonstrated a 1.6 fold increase in invasive potential as compared to Hep3B-Vec cells (Figure 2J). The Hep3B-Vec and Hep3B-TFF3 were also cultured in growth factor-reduced Matrigel to allow three-dimensional growth in a condition that closely mimics the *in vivo* tissue environment [37]. After 9 days of growth in 4% Matrigel, Hep3B-TFF3 cells exhibited markedly higher total cell viability than Hep3B-Vec as measured using the Alamar Blue assay (Figure 2K). To verify the effect of TFF3 on other HCC cells, the same experiments were repeated in Huh7 cells and similar effects on cell behavior were observed (Supplementary Figures 1B-1K). It can be concluded that forced expression of TFF3 increases HCC cell proliferation, cell survival, anchorage independent cell growth, invasion and migration, and 3D matrigel growth.

Tumor xenografts were established by injecting Hep3B-Vec and Hep3B-TFF3 cells into the left or right flanks of nude mice (BALB/c *nu/nu* male mice). Tumors developed in all mice one week after inoculation. Consistent with *in vitro* data, forced expression of TFF3 promoted Hep3B cell-derived xenograft growth with Hep3B-TFF3 cell-derived tumors being twice the size of Hep3B-Vec cell-derived tumors after 28 days (Figure 2L).

### Depleted expression of TFF3 decreases oncogenicity of HCC Cells

A Hep3B cell model with depleted TFF3 expression was generated and the resulting functional consequences were investigated. After transfection with the pSilencer-TFF3 plasmid [16], Hep3B-siTFF3 cells were observed to express lower levels of TFF3 (Figure 3A) and exhibited smaller increases in cell number in both 0.2% and 10%

FBS supplemented medium (Figure 3B) as compared to its corresponding control Hep3B-siVec cells. However, BrdU incorporation results did not show a statistically significant difference between Hep3B-siTFF3 and Hep3B-siVec (Figure 3C). Also, cell cycle analysis showed only a slight decrease in the S-phase fraction of cells in Hep3B-siTFF3 cells compared with Hep3B-siVec cells (Figure 3D). More precisely, 24.8% of Hep3B-siVec cells were in S-phase compared with 21.8% of Hep3B-siTFF3 cells (no statistical significance). Nevertheless, the depletion of TFF3 increased the proportion of apoptotic nuclei and caspase 3/7 activity of Hep3B cells (Figures 3E and 3F,  $p < 0.05$ ). These results indicate that a decrease in cell survival, rather than a decrease in proliferation, leads to the reduction in total cell number of Hep3B cells upon depletion of TFF3.

In the soft agar formation assay, depleted expression of TFF3 dramatically decreased cell anchorage-independent growth (Figure 3G). Hep3B-siTFF3 cells produced only an average of 37.2 colonies per well, whereas Hep3B-siVec cells produced an average of 58.5 colonies per well ( $p < 0.05$ ). In the foci formation assay, Hep3B-siTFF3 cells formed less and smaller colonies compared to Hep3B-siVec cells (Figure 3H).

The depletion of TFF3 significantly reduced migration of Hep3B cells (Figure 3I). Furthermore, Hep3B-siTFF3 cells exhibited decreased invasive potential as compared to Hep3B-siVec cells (Figure 3J). In 3D matrigel growth assay, there was a significant decrease in cell viability in Hep3B-siTFF3 cells compared with Hep3B-siVec cells (Figure 3K). The similar effects were also observed in HepG2 cell with TFF3 depletion (Supplementary Figures 2A-2J). Thus, depletion of TFF3 reduces cell survival, anchorage independent cell growth, invasion and migration, and 3D matrigel growth of HCC cells.

Tumor xenografts derived from Hep3B-siVec and Hep3B-siTFF3 cells were similarly established in nude mice. Consistent with *in vitro* data, the depletion of TFF3 resulted in attenuated tumor growth of Hep3B-siTFF3 cell-derived xenograft as compared to Hep3B-siVec cell-derived xenograft (Figure 3L). Hence, it can be concluded that the modulation of TFF3 expression affects HCC growth *in vivo*.

### TFF3 modulates cell cycle, apoptotic and EMT-related gene expression in HCC cells

A gene expression profile was analysed using qPCR to examine the effect of forced or depleted expression of TFF3 on the relative expression of genes involved in cell cycle progression and cell survival (Table 1). Forced expression of TFF3 increased the expression of *CDK4* and *CDK2* (cyclin-dependent kinase) and their regulators *CCND1* (Cyclin D1) and *CCNE1* (Cyclin E1), which are directly involved in cell cycle regulation and are required

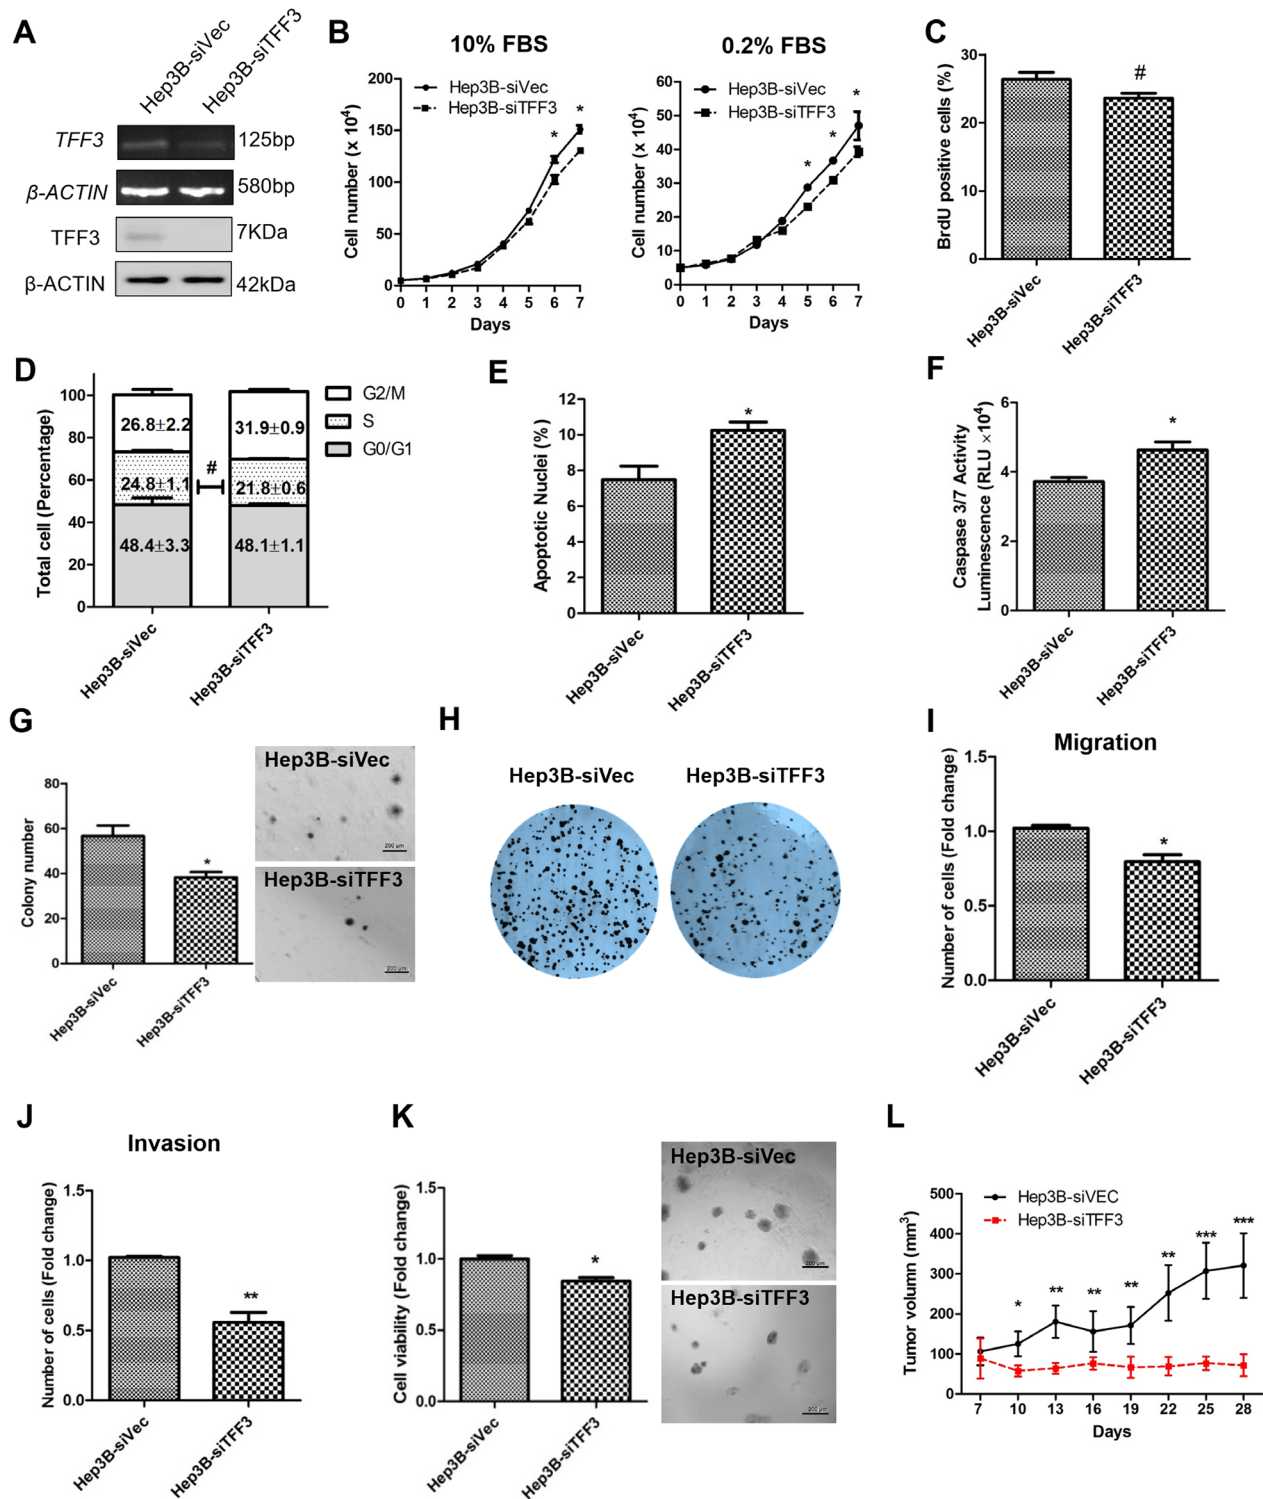

**Figure 3: Depleted expression of TFF3 decreases oncogenicity in Hep3B cells.** Hep3B cells were stably transfected with an expression vector containing the TFF3 siRNA gene (designated Hep3B-siTFF3) or pSilencer vector alone (Hep3B-siVec). (A) Detection of TFF3 expression with RT-PCR and western blot,  $\beta$ -ACTIN was used as input control. (B) Total cell number counting in DMEM media supplemented with 10% or 0.2% FBS over 7 days. (C) BrdU incorporation assay. (D) Cell cycle analysis. (E) Apoptosis assay. Percentage of apoptotic nuclei after 24h serum deprivation are shown in the histogram. (F) Caspase 3/7 activity after 24h serum deprivation. (G) Soft agar colony formation. Colony numbers are shown in the histogram. (H) Foci formation. (I) Cell migration assay. (J) Cell invasion assay. Number of cells penetrating the transwell membrane. (K) 3D Matrigel growth. Cell viability is shown in the histogram. (L) *in vivo* tumor formation. Tumor volumes were measured every 3 days until 6 weeks. Data were expressed as mean  $\pm$  S.E.M. \*,  $p < 0.05$ ; \*\*,  $p < 0.01$ ; and \*\*\*,  $p < 0.001$ ; #, no significance

**Table 1: Forced/depleted expression of TFF3 alters the gene expression in Hep3B cells**

| Functional Gene Grouping               | Gene            | TFF3/Vec Fold Change | <i>p</i> value | siTFF3/siVec Fold Change | <i>p</i> value |
|----------------------------------------|-----------------|----------------------|----------------|--------------------------|----------------|
| Cell Cycle Control & DNA Damage Repair | <i>CCND1</i>    | 2.67                 | 1.73E-04       | 0.94                     | 2.67E-01       |
|                                        | <i>ATM</i>      | 1.10                 | 3.18E-03       | 0.93                     | 6.45E-02       |
|                                        | <i>BRCA1</i>    | 1.35                 | 2.60E-06       | 0.54                     | 1.30E-01       |
|                                        | <i>CCNE1</i>    | 2.49                 | 3.31E-04       | 0.78                     | 7.74E-02       |
|                                        | <i>CDC25A</i>   | 1.47                 | 2.54E-04       | 0.92                     | 6.85E-02       |
|                                        | <i>CDK2</i>     | 1.41                 | 1.99E-04       | 0.87                     | 4.52E-01       |
|                                        | <i>CDK4</i>     | 3.01                 | 4.02E-05       | 1.05                     | 2.92E-03       |
|                                        | <i>CDKN1A</i>   | 0.34                 | 1.41E-05       | 2.21                     | 6.35E-02       |
|                                        | <i>CDKN2A</i>   | 0.97                 | 3.18E-01       | 1.77                     | 8.94E-03       |
|                                        | <i>CHEK2</i>    | 0.73                 | 1.22E-04       | 1.55                     | 8.55E-02       |
|                                        | <i>E2F1</i>     | 1.29                 | 2.43E-04       | 0.93                     | 1.08E-01       |
|                                        | <i>MDM2</i>     | 0.54                 | 6.98E-03       | 0.99                     | 1.57E-01       |
|                                        | <i>RB1</i>      | 0.89                 | 3.41E-04       | 0.98                     | 2.09E-03       |
|                                        | <i>S100A4</i>   | 1.14                 | 9.99E-04       | 1.19                     | 1.21E-01       |
|                                        | <i>TP53</i>     | 1.01                 | 4.09E-04       | 1.00                     | 1.20E-03       |
| <i>CDKN1B</i>                          | 0.99            | 1.56E-04             | 1.30           | 1.59E-02                 |                |
| Apoptosis and Cell Senescence          | <i>APAF1</i>    | 0.95                 | 2.98E-03       | 1.40                     | 3.96E-03       |
|                                        | <i>BCLAF1</i>   | 0.89                 | 2.11E-03       | 1.00                     | 7.36E-02       |
|                                        | <i>BAK1</i>     | 0.73                 | 1.74E-04       | 7.01                     | 3.32E-03       |
|                                        | <i>BAD</i>      | 0.53                 | 2.33E-05       | 1.61                     | 8.95E-04       |
|                                        | <i>BAX</i>      | 0.22                 | 1.56E-02       | 4.08                     | 4.32E-03       |
|                                        | <i>BCL2</i>     | 6.56                 | 3.15E-05       | 0.37                     | 5.68E-02       |
|                                        | <i>BCL2L1</i>   | 2.75                 | 2.07E-04       | 0.64                     | 1.90E-02       |
|                                        | <i>CFLAR</i>    | 0.92                 | 3.80E-03       | 1.20                     | 8.95E-04       |
|                                        | <i>CASP7</i>    | 0.44                 | 4.62E-04       | 1.84                     | 8.97E-03       |
|                                        | <i>GZMA</i>     | 1.06                 | 4.05E-02       | 0.74                     | 3.05E-01       |
|                                        | <i>HTATIP2</i>  | 0.95                 | 8.33E-05       | 0.55                     | 1.46E-04       |
|                                        | <i>TERT</i>     | 3.82                 | 2.07E-03       | 0.42                     | 1.43E-03       |
|                                        | <i>TNFRSF1A</i> | 1.01                 | 2.61E-03       | 1.11                     | 2.30E-03       |
| <i>TNFRSF10B</i>                       | 1.05            | 3.51E-05             | 1.04           | 1.68E-01                 |                |
| <i>TNFRSF25</i>                        | 0.97            | 1.45E-01             | 0.67           | 5.79E-03                 |                |
| EMT and stem cell                      | <i>TWIST1</i>   | 1.45                 | 1.07E-01       | 1.04                     | 5.93E-02       |
|                                        | <i>FN1</i>      | 0.62                 | 5.77E-04       | 0.93                     | 4.36E-01       |
|                                        | <i>SNAIL</i>    | 0.89                 | 2.35E-01       | 1.36                     | 2.15E-02       |
|                                        | <i>SNAIL2</i>   | 6.06                 | 9.46E-04       | 0.67                     | 2.38E-01       |

(Continued)

| Functional Gene Grouping | Gene          | TFF3/Vec Fold Change | <i>p</i> value | siTFF3/siVec Fold Change | <i>p</i> value |
|--------------------------|---------------|----------------------|----------------|--------------------------|----------------|
|                          | CTNNA1        | 0.94                 | 6.90E-03       | 0.61                     | 3.83E-02       |
|                          | CTNNB1        | 1.00                 | 5.54E-03       | 2.27                     | 1.28E-03       |
|                          | VIM           | 0.58                 | 5.93E-04       | 0.78                     | 2.80E-01       |
|                          | CDH1          | 0.60                 | 2.11E-01       | 0.92                     | 4.07E-01       |
|                          | CDH2          | 0.90                 | 1.69E-04       | 1.07                     | 1.91E-01       |
|                          | ZEB1          | 2.34                 | 1.23E-01       | 0.94                     | 4.16E-01       |
|                          | ZEB2          | 1.76                 | 1.03E-03       | 1.07                     | 1.23E-01       |
|                          | NCAM1         | 0.76                 | 3.26E-02       | 2.00                     | 1.78E-02       |
|                          | OCLN          | 0.47                 | 9.67E-04       | 5.34                     | 2.11E-01       |
|                          | FOXC2         | 2.72                 | 3.14E-02       | 0.94                     | 2.87E-01       |
|                          | SALL4         | 4.97                 | 1.19E-01       | 0.31                     | 7.99E-03       |
|                          | CSF1          | 3.90                 | 2.12E-01       | 1.10                     | 2.51E-01       |
|                          | NOTCH1        | 0.82                 | 2.96E-01       | 0.96                     | 1.57E-02       |
|                          | IGF1          | 1.38                 | 1.17E-01       | 1.62                     | 5.48E-03       |
|                          | KLF4          | 1.31                 | 2.86E-03       | 0.77                     | 5.81E-03       |
|                          | SOX2          | 0.93                 | 2.62E-03       | 0.50                     | 1.68E-02       |
|                          | ALDH1         | 3.75                 | 1.94E-03       | 0.38                     | 2.00E-02       |
|                          | WNT5A         | 0.94                 | 3.61E-02       | 0.98                     | 1.41E-01       |
|                          | WNT5B         | 0.96                 | 1.99E-01       | 1.27                     | 9.37E-02       |
|                          | NANOG         | 2.81                 | 1.13E-02       | 0.81                     | 3.36E-01       |
|                          | <i>BMI1</i>   | 3.75                 | 6.78E-02       | 0.34                     | 2.70E-02       |
|                          | <i>POU5F1</i> | 0.91                 | 4.81E-02       | 1.03                     | 4.55E-02       |
|                          | <i>CD24</i>   | 0.97                 | 1.60E-02       | 0.36                     | 1.35E-02       |
|                          | <i>CD44</i>   | 3.39                 | 3.91E-02       | 0.50                     | 3.16E-02       |
|                          | <i>CD133</i>  | 3.97                 | 3.89E-03       | 0.80                     | 3.51E-01       |

The qPCR experiment was performed three times and the result shown as mean  $\pm$  S.E.M. of triplicates in a representative experiment.

for cell cycle G1/S transition [38, 39]. However, those genes were not significantly altered in Hep3B-siTFF3 cells, which was consistent with the cell cycle analysis results (Figure 3D). *CDKN1A* (cyclin-dependent kinase inhibitor/p21), a negative regulator of cell growth [38], was found to be reduced in Hep3B-TFF3 cells but increased in Hep3B-siTFF3 cells. Such gene expression profiles are consistent with the increase in BrdU-positive cells and S-phase population in Hep3B-TFF3 cells. TFF3-stimulated cell proliferation is attributed to the regulation of these cell cycle regulators by TFF3. These observations

are consistent with a previous study that TFF3 promotes the cell cycle through the accumulation of cyclin D1 to promote cell proliferation [40].

*BCL-2*, an anti-apoptotic gene, exhibited increased mRNA expression of more than 6 fold in Hep3B-TFF3 cells and decreased mRNA expression in Hep3B-siTFF3 cells as compared to their respective control cells (Table 1). In contrast, *BAX*, a cell death mediator inducing mitochondrial damage [41], was significantly downregulated in Hep3B-TFF3 cells and upregulated in Hep3B-siTFF3 cells as compared to the control cells



(Table 1). In addition, mRNA levels of several pro-apoptotic genes, *BAD*, and *CASP7* (Caspase7) were also decreased with forced expression of TFF3 and increased with depletion of TFF3 in Hep3B. Furthermore, *TERT* mRNA was found to be increased in Hep3B-TFF3 but decreased in Hep3B-siTFF3 cells as compared to their relative control cells, potentially indicative of decreased cellular senescence and enhanced cell survival [42]. These results are concordant with the decreased apoptosis observed in Hep3B-TFF3 cells.

In addition, the mRNA expression of several mesenchymal gene markers, including *SNAIL2*, *FOXC2* and *ZEB2*, was observed to be increased, while that of an epithelial gene marker *OCN* was decreased in Hep3B-TFF3 as compared to Hep3B-Vec cells, consistent with TFF3-stimulated invasion and migration of HCC cells. Although TFF3 was observed to stimulate EMT of HCC cells, the classic EMT gene expression pattern was not completely observed upon forced expression or depletion of TFF3 in HCC cells.

### TFF3 reduces the sensitivity of HCC cells to doxorubicin

Doxorubicin is a commonly used chemotherapeutic drug for the treatment of advanced HCC, and intrinsic resistance to doxorubicin is a major challenge [43]. TFF3 has previously been reported to be upregulated in liver tissue and hepatocytes following doxorubicin administration [44]. In order to investigate the possible role of TFF3 in HCC chemosensitivity, we determined the effects of forced or depleted expression of TFF3 on doxorubicin sensitivity in Hep3B cells. The half maximal inhibitory concentration ( $IC_{50}$ ) of doxorubicin was measured in Hep3B cells with forced or depleted expression of TFF3 and analysed using nonlinear regression, summarized in Figure 4A. Forced expression of TFF3 significantly increased the  $IC_{50}$  of doxorubicin by 7 fold (Hep3B-Vec / Hep3B-TFF3 =  $1.01\mu\text{M} / 7.02\mu\text{M}$ ,  $p < 0.005$ ) in Hep3B cells. In contrast, depleted expression of TFF3 significantly decreased the  $IC_{50}$  of doxorubicin (Hep3B-siVec / Hep3B-siTFF3 =  $0.99\mu\text{M} / 0.35\mu\text{M}$ ,  $p < 0.01$ ) by 3 fold in Hep3B cells. Hence Hep3B-TFF3 cells exhibited lower chemosensitivity compared to Hep3B-Vec cells, while Hep3B-siTFF3 showed higher chemosensitivity than Hep3B-siVec cells.

It has been reported that drug resistance in cancer cells correlates with drug efflux [45]. We observed a significant increase in the efflux of doxorubicin and a significant decrease in the cellular accumulation of doxorubicin in Hep3B-TFF3 cells as compared to Hep3B-Vec cells (Figure 4B). Several ABC transporters function as drug efflux pumps which are responsible for intrinsic resistance [45, 46]. Multidrug resistance 1 gene (*MDR1*) was significantly increased in HCC cells with forced expression of TFF3. However, the other two ABC drug

efflux transporters, breast cancer resistance protein (BCRP/ ABCG2) and MRP1 (ABCC1), did not exhibit significant differences of expression in Hep3B-TFF3 cells versus Hep3B-Vec cells (Figure 4C). Furthermore, Verapamil, an MDR1 inhibitor, significantly decreased doxorubicin efflux and increased doxorubicin accumulation in Hep3B-Vec cells, and abrogated the enhanced doxorubicin efflux in Hep3B-TFF3 cells (Figure 4B). These results suggest that enhancement of drug efflux by TFF3 in Hep3B cells is MDR1-dependent.

### TFF3 increases cancer stem cell-like behavior in HCC cells

Previous studies have suggested that CSC-like HCC cells are the culprits for doxorubicin- and 5-FU-resistance [10], and these spheroid-forming HCC cells exhibit stem cell-like properties [47]. Hep3B cells with forced expression of TFF3 exhibited a marked increase in the formation of spheroids compared with Hep3B-Vec control cells. In contrast, Hep3B cells with depleted expression of TFF3 formed fewer spheroids compared with its Hep3B-siVec control cells (Figure 4D). In order to confirm that the increase in spheroid formation represents the progeny of individual CSC rather than the aggregation of quiescent cells, we examined the spheroid-forming ability of primary spheroid-forming cells (G1) to form second generation (G2) and third generation (G3) spheroids. The forced expression of TFF3 enhanced G2 and G3 spheroid formation, while the depletion of TFF3 reduced G2 and G3 spheroid formation in Hep3B cells (Figures 4E-4F).

Side-population (SP) cells isolated from HCC cells exhibit CSC-like properties, suggestive of a contribution of this cell population to chemoresistance [48]. Flow cytometry analysis recorded a significant increase in the proportion of SP cells in Hep3B-TFF3 cells ( $8.3 \pm 0.4\%$ ) compared with Hep3B-Vec cells ( $2.0 \pm 0.1\%$ ). Conversely, the percentage of SP cells was decreased in Hep3B-siTFF3 cells ( $1.5 \pm 0.1\%$ ) compared with Hep3B-siVec cells ( $2.1 \pm 0.2\%$ ) (Figure 4G). Previous studies have also suggested the utility of aldehyde dehydrogenase 1 (ALDH1) to identify liver stem cells [49]. To determine whether TFF3 modulated the ALDH1-positive (ALDH1+) cell population in HCC cells, we measured the percentage of ALDH1+ cell population in Hep3B stable cell lines using an ALDFLUOR assay. The percentage of ALDH1+ cells in Hep3B cell lines was increased by the forced expression of TFF3 and decreased by depleted expression of TFF3 (Figure 4H).

Several stem cell markers such as *CD44*, *CD133* and *ALDH1*, have been widely used to identify CSCs [50], and were observed to be upregulated in Hep3B-TFF3 cells but downregulated in Hep3B-siTFF3 cells as compared to their respective controls (Table 1). In addition, *FOXC2*, *SALL4*, *CSF1* and *BMI1* mRNA levels were also increased in Hep3B-TFF3 cells, all of which have

recently been suggested to be involved in promoting CSC-like characteristics in various cancer cells. *FOXC2* has been demonstrated not only to be involved in epithelial-mesenchymal transition (EMT) but also contributes to stem cell properties in cancer cells [51]. *SALL4* is a transcription factor and is responsible for regulating the

stemness of hepatic CSCs [52]. Upregulation of *CSF1* has been demonstrated to facilitate tumor invasion and contribute to CSC-like properties in HCC [53]. *BMI1* has been found to regulate the self-renewal of hepatic cancer stem cells [54]. Taken together with the functional assays, the upregulation and downregulation of these stem cell-

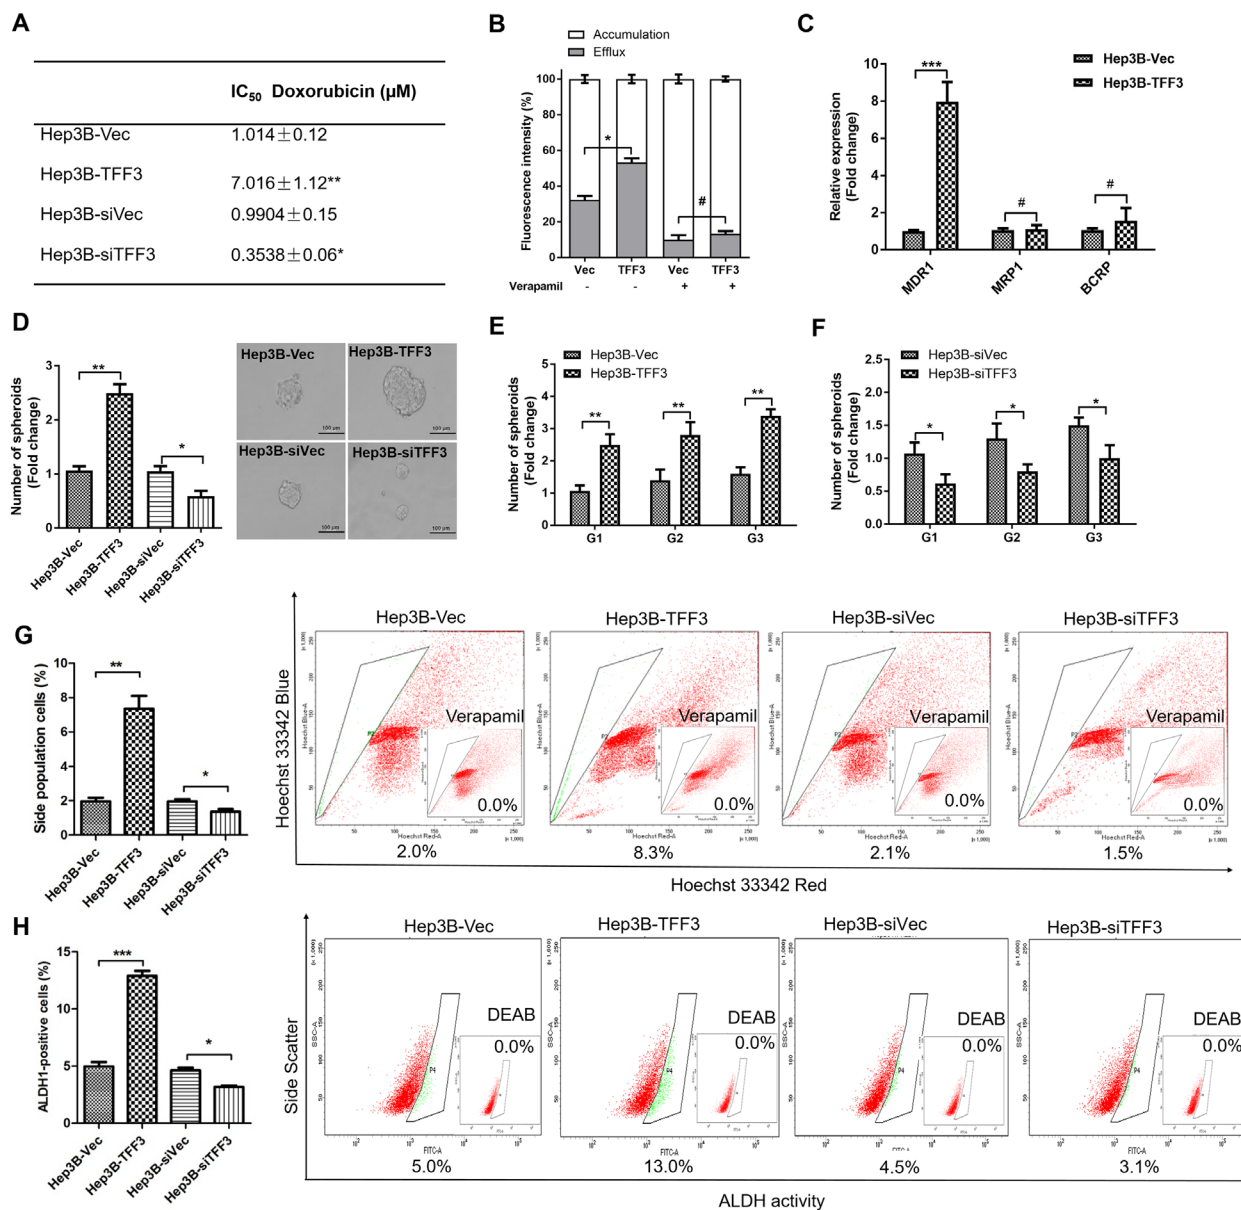

**Figure 4: TFF3 decreases chemosensitivity and promotes CSC-like properties in HCC cells.** (A) The IC<sub>50</sub> of doxorubicin in Hep3B was measured and analysed using nonlinear regression. (B) Efflux and accumulation of doxorubicin in Hep3B cells. (C) q-PCR analysis of genes involved in drug resistance. Verapamil was used to block the ABC membrane transporter from extruding the doxorubicin. (D) Spheroid formation. The number of spheroids formed by Hep3B-Vec, -TFF3, siVec and -siTFF3 cells is shown in the histogram. (E) Spheroid formation ability after passage to G3 in Hep3B-TFF3 and Hep3B-Vec. (F) Spheroid formation ability after passage to G3 in Hep3B-siTFF3 and Hep3B-siVec. (G) The percentages of side-population in Hep3B-Vec, -TFF3, siVec and -siTFF3 cells were determined by flow cytometry. Verapamil was used to inhibit the ABC membrane transporter from extruding the Hoechst 33342 dye to establish the baseline for the identification of side population cells that efflux the Hoechst 33342 dye. (H) The percentages of ALDH+ cells in Hep3B-Vec, -TFF3, siVec and -siTFF3 cells were analysed using flow cytometry. The cells were incubated with the ALDEFLUOR substrate to define ALDH+ cells, while DEAB, a specific inhibitor for ALDH1A1 isoform, was used to establish the baseline fluorescence. Data were expressed as mean ± S.E.M. \*,  $p < 0.05$ ; \*\*,  $p < 0.01$ ; and \*\*\*,  $p < 0.001$ ; #, no significance.

related genes in Hep3B-TFF3 cells and Hep3B-siTFF3 cells respectively, lend support to the notion that TFF3 regulates the stemness of Hep3B cells.

### **TFF3 modulation of oncogenicity and CSC-like properties are BCL-2 dependent and mediated by AKT activation in HCC cells**

Our previous study has suggested that TFF3 promotion of oncogenic behavior in breast cancer cells is BCL-2 dependent [16]. As *BCL-2* mRNA expression was also increased in HCC cells with forced expression of TFF3, TFF3 may partially execute its functional effects through BCL-2. Therefore, we further investigated whether TFF3 regulates BCL-2 expression in HCC cells. We observed that the *BCL-2* promoter luciferase reporter activity in Hep3B-TFF3 cells was greater than that in Hep3B-Vec cells (Figure 5A), indicating that TFF3 promotes *BCL-2* gene transcription in Hep3B cells. The ratio between the proapoptotic protein BAX and antiapoptotic protein BCL-2 was also significantly decreased as a result of forced expression of TFF3 in Hep3B cells (Table 1 and Figure 5B), which indicates a strong repression of the apoptotic cascade [55]. In contrast, depleted expression of TFF3 in HCC cells decreased BCL-2 protein expression and increased BAX protein expression (Figure 5B).

We next utilized the BCL-2 specific inhibitor YC137 to investigate the role of BCL-2 in TFF3-promoted HCC cell survival. The effect of BCL-2 inhibition on cell apoptosis was measured at different concentrations of YC137. YC137 at a concentration of 5 $\mu$ M fully abrogated the acquired cell survival advantage consequent to forced expression of TFF3 (Figure 5C), suggesting that TFF3-enhanced HCC cell survival is BCL-2-dependent. Moreover, YC137 at 5 $\mu$ M concentration fully abrogated the increased 3D Matrigel growth stimulated by forced expression of TFF3 in Hep3B-TFF3 cells (Figure 5D). Furthermore, the TFF3-promoted spheroid formation was partially abrogated by YC137 (Figure 5E). These results suggest that TFF3-stimulated oncogenicity and CSC-like properties are BCL-2-dependent.

The PI-3K/AKT signal transduction pathway is regulated by TFF3 [56]. We observed a significant increase in AKT activation (phosphorylation at Ser473) which correlated with increased BCL-2 expression in Hep3B-TFF3 cells as compared to Hep3B-Vec cells (Figure 5B). Hence, AKT activation may regulate BCL-2 expression in Hep3B cells in response to forced expression of TFF3. We therefore determined whether TFF3 modulates AKT activity in Hep3B cells. AKT inhibitor V was used to inhibit AKT activity [57]. AKT inhibitor V decreased both AKT activity and BCL-2 expression in a dose-dependent manner in Hep3B cells (Figure 5F). However, TFF3 expression was not affected by AKT inhibitor V treatment, suggesting that TFF3 is

an upstream regulator of AKT activation in Hep3B cells. We also observed that cell apoptosis was significantly elevated after the addition of AKT inhibitor V in both Hep3B-Vec and Hep3B-TFF3 (Figure 5G). AKT inhibitor V at higher concentration (5 $\mu$ M) totally abrogated TFF3-enhanced cell survival. AKT inhibitor V at 5 $\mu$ M concentration also abrogated the increased 3D Matrigel growth stimulated by forced expression of TFF3 in Hep3B-TFF3 cells (Figure 5H). Hence, AKT activation is important for TFF3 promotion of cell survival and growth in Hep3B cells.

We further investigated whether TFF3 utilizes AKT to regulate CSC-like properties in Hep3B cells. AKT inhibitor V decreased spheroid formation in Hep3B cells (Figure 5I). As such, it can be deduced that TFF3 mediates oncogenicity and CSC-like behavior of HCC cells in an AKT-dependent manner.

### **TFF3 promotes CSC-like behavior in doxorubicin resistant HCC cells**

We further investigated the effect of TFF3 in modulating acquired doxorubicin resistance in HCC cells through the generation of Hep3B cells with acquired doxorubicin resistance. The response to doxorubicin was significantly decreased in Hep3B-Dox cells compared with Hep3B-Ctl cells (Supplementary Figure 3A). TFF3 expression, phosphorylated-AKT and BCL-2 expression were all elevated in Hep3B-Dox cells compared to Hep3B-Ctl cells (Figure 6A). Doxorubicin efflux was also enhanced in Hep3B-Dox cells compared to the control cells (Figure 6B). Furthermore, chemoresistance-associated gene expression was elevated in Hep3B-Dox cells, in which both MDR1 and BCRP were significantly increased in expression (Figure 6C). We further investigated whether CSC properties were increased in doxorubicin-resistant Hep3B cells. Spheroid formation ability, side population and the ALDH1+ cell population were increased in Hep3B-Dox cells compared with Hep3B-Ctl cells (Figures 6D-6F). Hence, HCC cells with acquired doxorubicin resistance exhibited increased TFF3 expression and enhanced CSC-like properties.

As TFF3 expression was increased in doxorubicin-resistant Hep3B cells, we further determined whether the increased TFF3 expression was responsible for the acquired resistance to doxorubicin. We observed that Hep3B-Dox cells were re-sensitized to doxorubicin by siRNA-mediated depletion of TFF3 (Figure 7A). Furthermore, AKT activity and BCL-2 expression were both attenuated after depletion of TFF3 in Hep3B-Dox cells (Figure 7B). Spheroid formation, side population and the percentage of ALDH1+ cells were also decreased in Hep3B-Dox cells after depletion of TFF3 (Figures 7C-7E). Hence, TFF3 exerts a functional role in maintaining CSC-like properties in doxorubicin-resistant Hep3B cells.

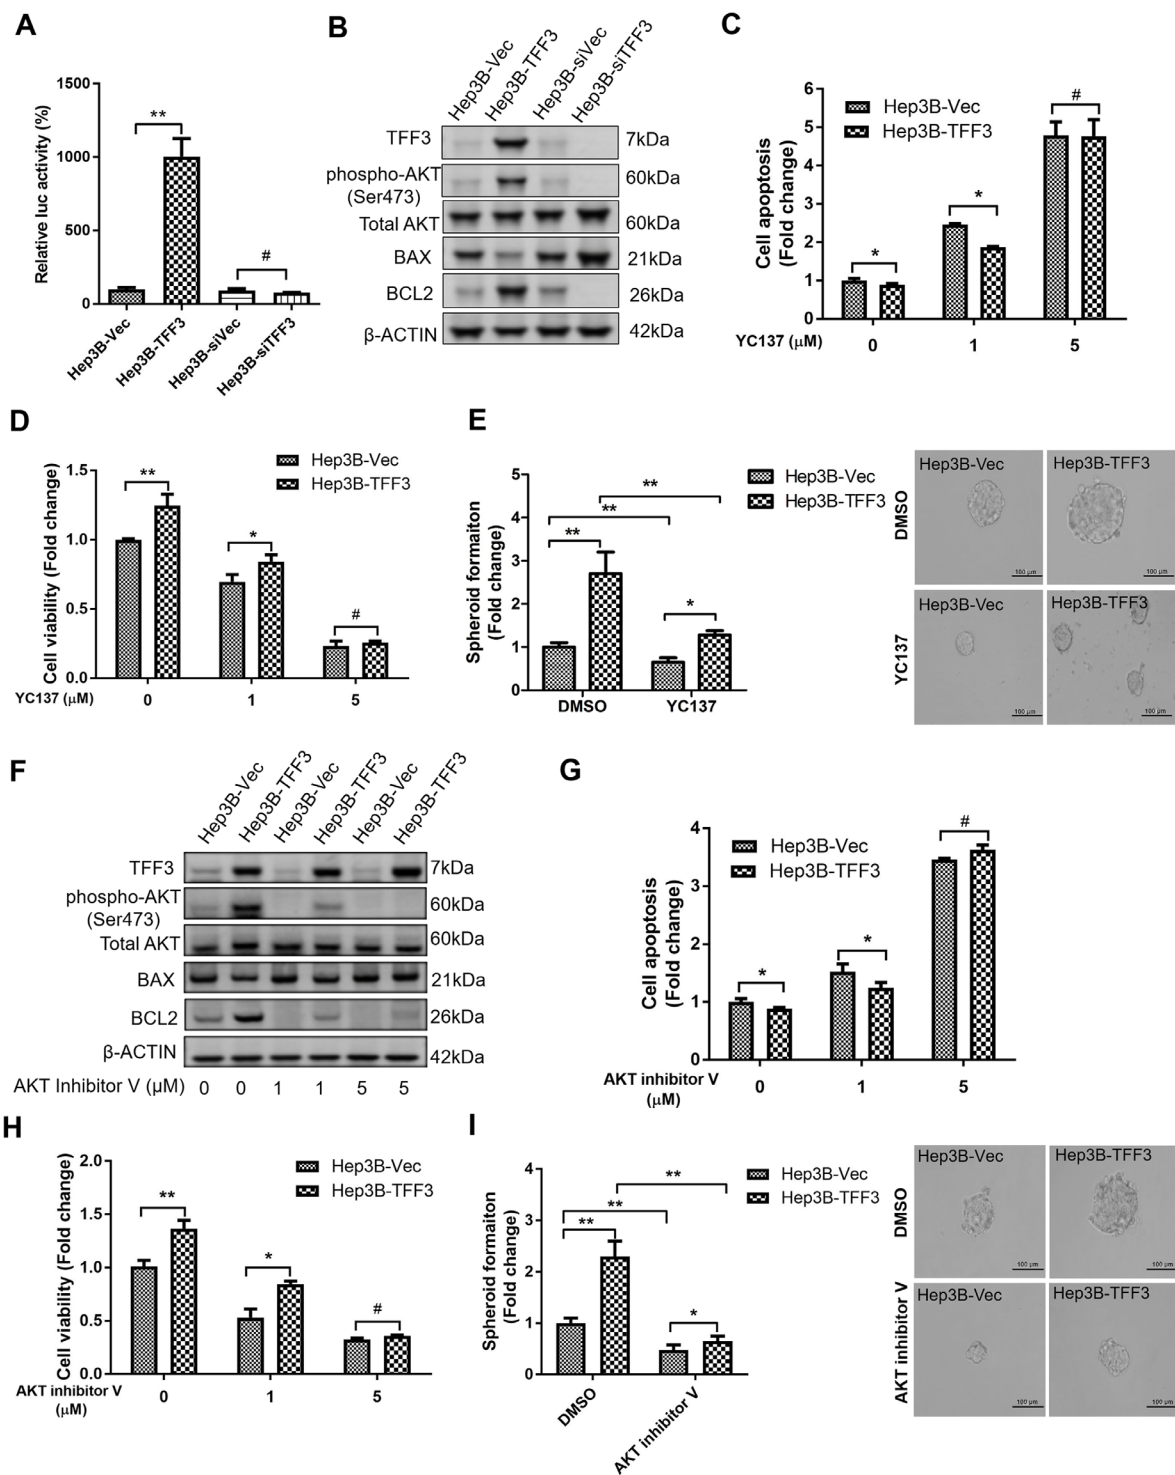

**Figure 5: TFF3 promotes oncogenicity and CSC-like properties in a BCL-2 dependent manner that is mediated by AKT activation in Hep3B cells.** Hep3B cells were stably transfected with an expression vector containing the TFF3 gene (designated Hep3B-TFF3) or pIRESneo3 vector alone (Hep3B-Vec), TFF3 siRNA gene (designated Hep3B-siTFF3) or pSilencer vector alone (Hep3B-siVec). (A) TFF3 expression modulates BCL2 promoter activity. (B) Detection of protein expression using western blot,  $\beta$ -ACTIN was used as input control. (C) Cell apoptosis assay using Caspase 3/7 activity after YC137 treatment. (D) 3D Matrigel growth after YC137 treatment. Cell viability is shown in the histogram. (E) Spheroid formation after YC137 treatment. Number of spheroids is shown in the histogram. (F) Detection of protein expression after treatment of AKT inhibitor V,  $\beta$ -ACTIN was used as input control. (G) Cell apoptosis assay using Caspase 3/7 activity after treatment of AKT inhibitor V. (H) 3D Matrigel growth after AKT inhibitor V treatment. Cell viability is shown in the histogram. (I) Spheroid formation after treatment of AKT inhibitor V. Number of spheroids is shown in the histogram. Data were expressed as mean  $\pm$  S.E.M. \*,  $p < 0.05$ ; \*\*,  $p < 0.01$ ; and \*\*\*,  $p < 0.001$ ,  $p < 0.001$ ; #, no significance.

## AKT activation and BCL-2 expression are required for TFF3 stimulated CSC-like behavior in doxorubicin-resistant HCC cells

We further investigated whether AKT activity was required for mediating doxorubicin resistance in Hep3B cells. Hep3B-Dox cells could be re-sensitized to doxorubicin treatment by inhibiting AKT activity (Figure 8A). Furthermore, the AKT inhibitor V abrogated

the increased BCL-2 expression in Hep3B-Dox cells (Figure 8B). In addition, spheroid formation ability, side population and percentage of ALDH1+ cells were dramatically reduced upon the inhibition of AKT activity in Hep3B-Dox cells (Figures 8C-8E). Moreover, the CSC-like behavior was also partially abrogated by BCL-2 inhibitor YC137 in Hep3B-Dox cells in terms of reduced spheroid formation, side population and the percentage of ALDH1+ cells (Supplementary Figures 3B-3D). These

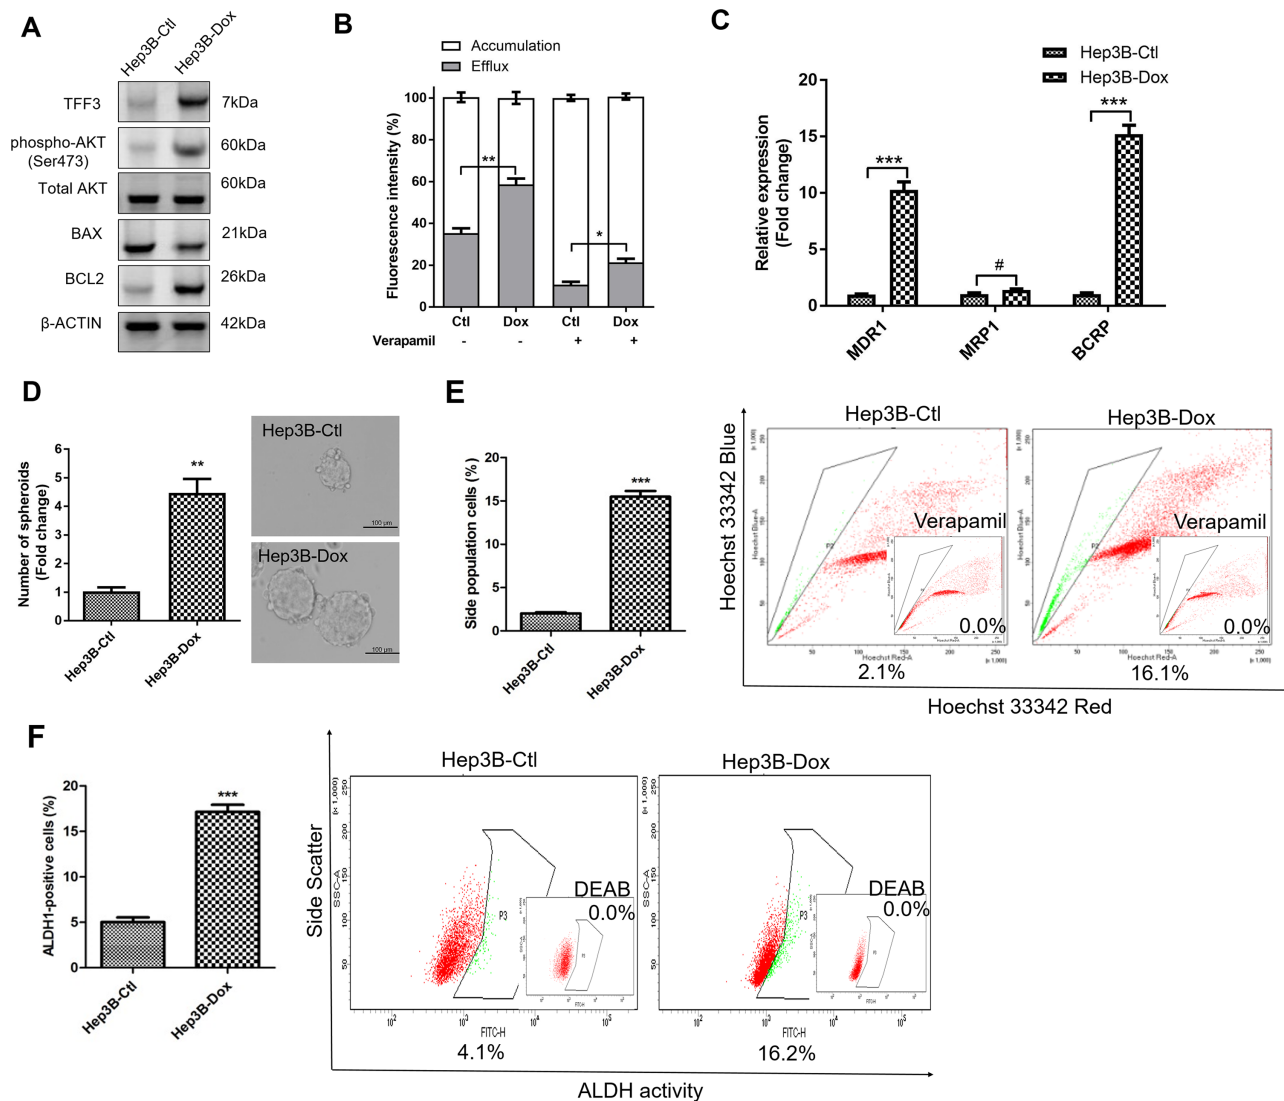

**Figure 6: Doxorubicin resistant Hep3B cells exhibit increased TFF3 expression and CSC-like properties.** Resistant cells were maintained in media with  $IC_{50}$  concentration of doxorubicin (designated as Hep3B-Dox cells). The control cells during selection were cultured in medium containing DMSO (designated as Hep3B-Ctl cells). **(A)** Increase TFF3 expression was measured using western blot in Hep3B-Dox cells. **(B)** Efflux and accumulation of doxorubicin in Hep3B-Dox cells. **(C)** q-PCR analysis of drug resistant gene expression in Hep3B-Dox cells. **(D)** Spheroid formation. The number of spheroids formed by Hep3B-Ctl and -Dox cells is shown in the histogram. **(E)** The percentages of side-population in Hep3B-Ctl and -Dox cells were determined by flow cytometry. Verapamil was used to inhibit the ABC membrane transporter from extruding the Hoechst 33342 dye to establish the baseline for the identification of side population cells that efflux the Hoechst 33342 dye. **(F)** The percentages of ALDH+ cells in Hep3B-Ctl and -Dox cells were analysed using flow cytometry. The cells were incubated with the ALDEFLUOR substrate to define ALDH+ cells, while DEAB, a specific inhibitor for ALDH1A1 isoform, was used to establish the baseline fluorescence. Data were expressed as mean  $\pm$  S.E.M. \*,  $p < 0.05$ ; \*\*,  $p < 0.01$ ; and \*\*\*,  $p < 0.001$ ; #, no significance.

data suggest that TFF3-mediated doxorubicin resistance and CSC-like behavior in Hep3B cells is AKT- and BCL-2-dependent.

## DISCUSSION

Herein, we have demonstrated that TFF3 promotes oncogenicity of HCC cells. This is consistent with our previous studies demonstrating that TFF3 stimulates cell proliferation, survival, migration, and 3D and anchorage-independent cell growth of mammary and prostate carcinoma cells [16, 17, 20, 21]. Literature evidence also suggests a clinical correlation of TFF3 with HCC. Increased expression of TFF3 has previously been detected in HCC specimens and associated with tumor size and stage, providing evidence for the clinical significance of TFF3 expression in HCC [31, 32]. The increased expression of TFF3 in HCC was found to be associated with hypomethylation at CpG

-260 of the *TFF3* promoter region [32]. Furthermore, the hypomethylated CpG sites locate into the binding motifs of several putative transcription factors in the TFF3 promoter region, indicating that TFF3 expression can be modulated by methylation status of the promoter region [58]. The expression levels of TFF3 gene in HCC tissues of HBx transgenic mice were also much higher than  $\alpha$ -fetoprotein (AFP), suggesting that TFF3 is a more sensitive HCC biomarker than the conventional AFP [59]. Consistently, increased expression of TFF3 in HCC samples was observed in this study, which predicted for poorer survival outcome. Given the low TFF3 expression in normal liver tissue and elevated TFF3 expression functionally mediating oncogenic roles in HCC, TFF3 could be a potential biomarker and therapeutic target in HCC. However, elevated TFF3 expression is observed not only in HCC but also in other cancers [60] and inflammatory conditions [61]. Hence, it is suggested that a combination of multiple biomarkers,

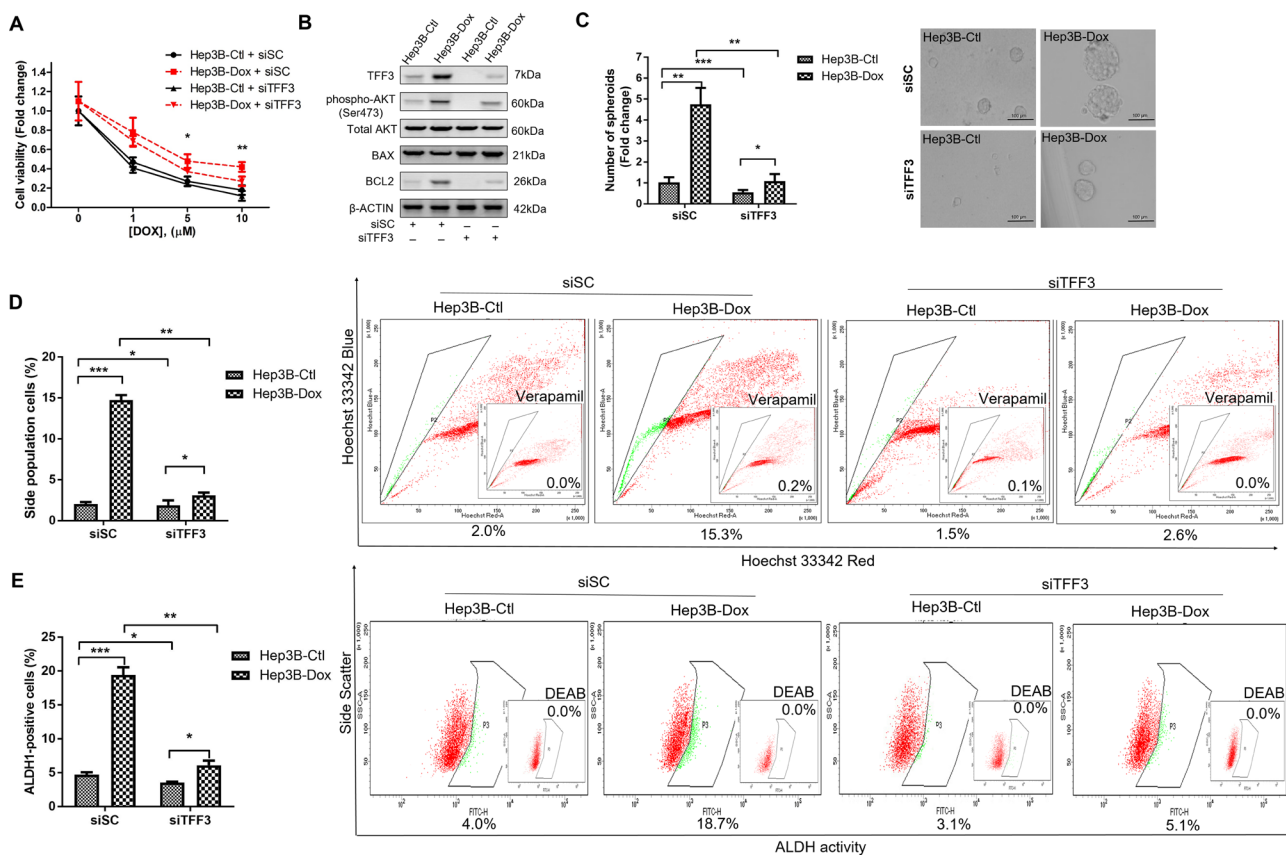

**Figure 7: Depletion of TFF3 increases doxorubicin response and decreases CSC-like properties of Doxorubicin-resistant Hep3B cells.** (A) Chemosensitivity was determined in Hep3B-Dox with transient transfection of siTFF3. Cell viability was measured with AlamarBlue. (B) TFF3, AKT activation (Ser473) and BCL-2 expression in Hep3B-Dox cells were measured using western blot. (C) Spheroid formation. The number of spheroids formed by Hep3B-Ctl and -Dox cells  $\pm$  siTFF3 is shown in the histogram. (D) The percentages of side-population in Hep3B-Ctl and -Dox cells  $\pm$  siTFF3 were determined by flow cytometry. Verapamil was used to inhibit the ABC membrane transporter from extruding the Hoechst 33342 dye to establish the baseline for the identification of side population cells that efflux the Hoechst 33342 dye. (E) The percentages of ALDH<sup>+</sup> cells in Hep3B-Ctl and -Dox cells  $\pm$  siTFF3 were analysed using flow cytometry. The cells were incubated with the ALDEFLUOR substrate to define ALDH<sup>+</sup> cells, while DEAB, a specific inhibitor for ALDH1A1 isoform, was used to establish the baseline fluorescence. Data were expressed as mean  $\pm$  S.E.M. \*,  $p < 0.05$ ; \*\*,  $p < 0.01$ ; and \*\*\*,  $p < 0.001$ .

including TFF3, would improve the sensitivity and accuracy of HCC diagnosis.

Chemoresistance remains a major obstacle to the efficacy of chemotherapeutic treatment of HCC [3]. Doxorubicin is a commonly used chemotherapeutic agent in HCC [62]. However, doxorubicin treatment of patients with HCC results in poor tumor response rates of only approximately 10% [3]. In our study, increased TFF3 expression was observed to contribute to doxorubicin resistance in HCC cells and depletion of TFF3 re-sensitized HCC cells to doxorubicin. Consistently, TFF3 was reported to be upregulated in doxorubicin-treated liver tissue and hepatocytes [44]. This data is consistent with a previous study showing that the silencing of TFF3 in gastric cancer cells promotes sensitivity to doxorubicin [23]. In further

support of our data herein, we have previously observed that TFF3 decreases sensitivity towards ionizing radiation in prostate cancer cells [20]. In addition, increased expression of TFF3 is fundamentally involved in acquired tamoxifen resistance and disease relapse in estrogen receptor positive (ER+) mammary carcinoma cells [16]. Similarly, increased TFF3 expression has also been observed to be associated with disease recurrence in ER+ patients treated with adjuvant aromatase inhibitor [22].

An important mechanism contributing to chemoresistance is evasion from apoptosis [63]. We have previously shown that TFF3 activates cell survival signaling pathways which contribute to anti-estrogen resistance in mammary carcinoma [16]. TFF3-enhanced cell survival and tamoxifen resistance have

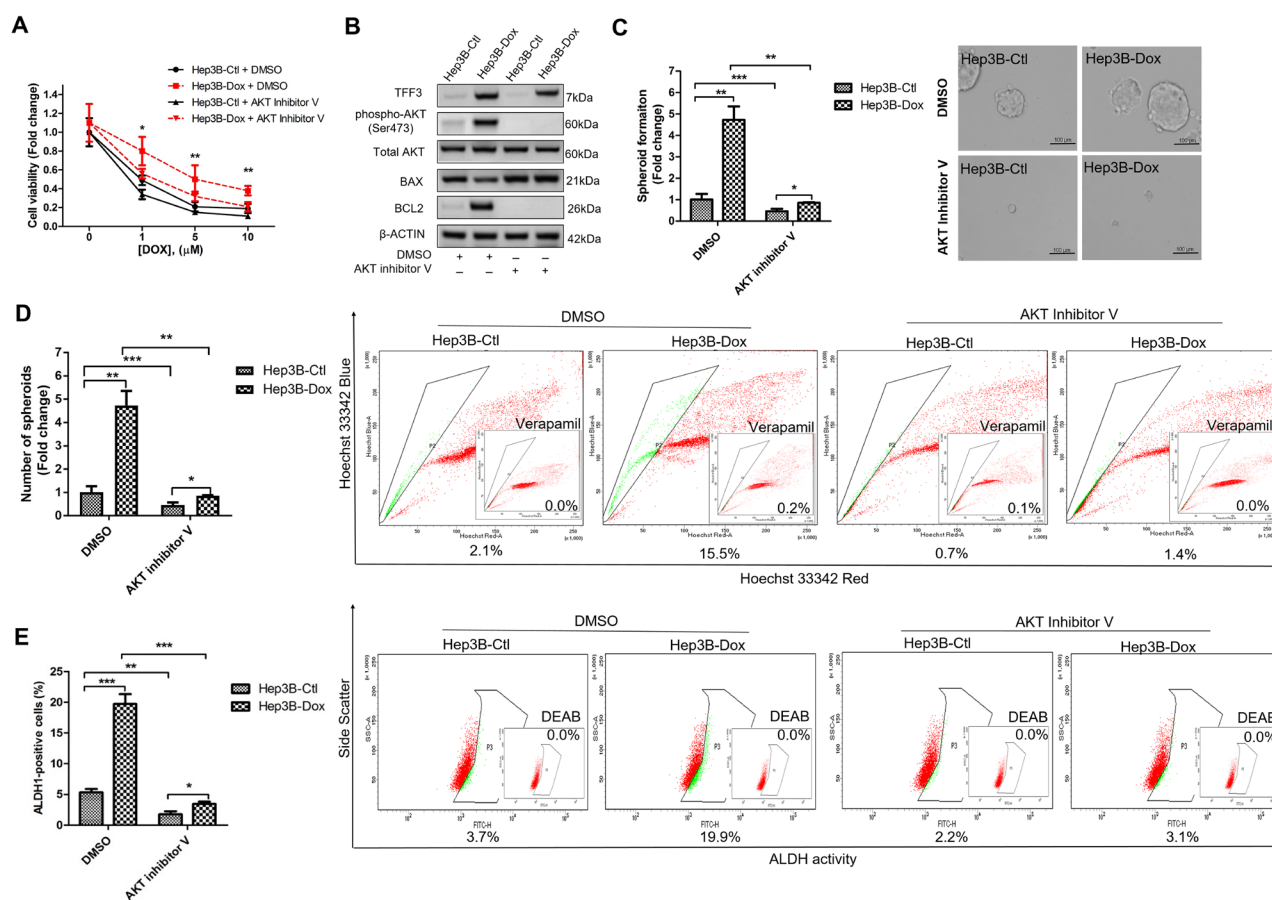

**Figure 8: Inhibition of AKT increases doxorubicin response and decreases CSC-like properties of Doxorubicin-resistant Hep3B cells.** (A) Chemosensitivity was determined in Hep3B-Dox cells with AKT inhibitor V treatment. Cell viability was measured with alamarBlue. (B) TFF3, AKT activation (Ser473) and BCL-2 expression in Hep3B-Dox cells were measured using western blot. (C) Spheroid formation. The number of spheroids formed by Hep3B-Ctl and Hep3B-Dox cells, treated either with 5 μM AKT inhibitor V or DMSO vehicle, was shown in the histogram. (D) The percentages of side-population in Hep3B-Ctl and Hep3B-Dox cells, treated either with 5 μM AKT inhibitor V or DMSO vehicle, were analysed using flow cytometry. Verapamil was used to inhibit the ABC membrane transporter from extruding the Hoechst 33342 dye to establish the baseline for the identification of side population cells that efflux the Hoechst 33342 dye. (E) The percentages of ALDH+ cells in Hep3B-Ctl and Hep3B-Dox cells, treated either with 5 μM AKT inhibitor V or DMSO vehicle, were analysed using flow cytometry. The cells were incubated with the ALDEFLUOR substrate to define ALDH+ cells, while DEAB, a specific inhibitor for ALDH1A1 isoform, was used to establish the baseline fluorescence. Data were expressed as mean ±S.E.M. \*,  $p < 0.05$ ; \*\*,  $p < 0.01$ ; and \*\*\*,  $p < 0.001$ .

both been suggested to be dependent on BCL-2 [16]. Consistently in this study, we identified BCL-2 as an important downstream mediator of cell survival and doxorubicin resistance in HCC. The AKT pathway is a well-recognized mediator of cell survival in response to a number of stimuli [64]. AKT is known to transcriptionally upregulate BCL-2 through cAMP-response element-binding protein (CREB) [65]. Several studies have provided evidence for the activation of AKT by TFF3, which stimulates cell survival [25, 26]. In this study, TFF3-mediated cell survival has been shown to be dependent on AKT and BCL-2 in response to doxorubicin treatment. TFF3 has been reported to act through EGFR to activate several downstream signaling pathways, including AKT [66]. Moreover, in a recent study, we observed that forced expression of TFF3 in breast cancer cells increases c-Src activation [17]. c-Src is a non-receptor tyrosine kinase which mediates activation of signaling pathways to further regulate cell proliferation, invasion, survival, metastasis, and angiogenesis [67]. c-Src has also been demonstrated to increase AKT activation in HCC progression [68]. These findings imply that TFF3 may modulate AKT activation through c-Src. Further work is needed to elucidate the upstream mediators of TFF3 functions in HCC.

The presence of a CSC-like population has been associated with chemoresistance in cancers [69]. Hepatic CSCs can be identified by using Hoechst 33342 stain as a side population [70]. The side population cells exhibits an increased ability to efflux chemotherapeutic agents through several members of the ATP-binding cassette family, such as MDR1 and BCRP [71]. ALDH has been reported as a CSC marker and is positively correlated with CD133 expression [49]. We observed that TFF3 expression increased the CSC-like properties of HCC cells, concordant with the acquisition of doxorubicin resistance. Furthermore, accumulating evidence indicates that tumor cells undergoing EMT acquire the ability to enter a CSC-like state, wherein they exhibit enhanced self-renewal properties, increased oncogenic potential and enhanced chemoresistance [72]. The poor prognosis in late stage HCC including chemoresistance, invasive dissemination and tumor relapse, are attributed to the EMT and CSC characteristics [72]. The link between EMT and CSC has been well-established in various cancers, including HCC [73]. In this study, several EMT and stem cell-related genes were also modulated by forced or depleted expression of TFF3. Consistently, TFF3 has previously been shown to promote migration and invasion of breast cancer cells, and modulate the expression of epithelial, mesenchymal and metastatic gene markers [17]. Increasing evidence has supported the role of the PI3K/AKT/mTOR signaling pathway in the maintenance of CSC in several cancers [74]. AKT has recently been reported to be a critical regulator of CSC survival and maintenance of the CSC phenotype in breast cancer [75]. Importantly, it was reported that the

activation of the AKT and BCL-2 cell survival response in CSCs confer chemoresistance in HCC [10]. In addition, AKT activation has been demonstrated to be involved in the regulation of ABC transporters and ALDH expression in HCC cells [76, 77]. BCL-2, as one of the downstream effectors of the AKT pathway, has also been implicated in chemotherapy resistance in CSCs [78]. Our findings suggest that TFF3-stimulated CSC functions, contributing to doxorubicin resistance, are regulated by AKT-dependent expression of BCL-2.

Taken together, TFF3 increases oncogenicity of HCC cells and increased TFF3 expression is associated with poorer survival outcome in HCC. Importantly, TFF3 reduces the sensitivity of HCC cells to doxorubicin and mediates acquired doxorubicin resistance through increasing survival, drug efflux and promoting CSC-like properties in HCC cells. Based on the current findings, TFF3 is a potential biomarker and therapeutic target in HCC. In addition, inhibition of TFF3 could be a potential approach to abrogate the development of chemoresistance in HCC and warrants investigation of the clinical potential of the combination of doxorubicin with a TFF3 inhibitor.

## MATERIALS AND METHODS

### Histopathological analysis

A cohort of 150 HCC patients was enrolled in this study with informed patient consent in accordance with the Declaration of Helsinki. The institutional review board of Anhui Medical University (AMU) (Hefei, Anhui, People's Republic of China) approved the protocol for the use of patient specimens in this study. Formalin-fixed and paraffin-embedded HCC tissue specimens (n = 138) and adjacent non-tumor specimens (n = 110) were studied. All patients underwent surgery at the First Affiliated Hospital of AMU. The immunohistochemical analysis of TFF3 protein expression was performed on 4 µm thick TMA sections with rabbit monoclonal antibodies against TFF3 (ab108599, 1:100, Abcam) by DAKO EnVision detection system containing DAKO EnVision +™ and DAB + chromogenic substrate (DAKO, Denmark). The details of the cohort and IHC scoring methodology have previously been described [79]. Briefly, we defined the evaluation of IHC staining was based on the combined expression pattern of all of the tissue from each patient sample. Stained sections were independently assessed for expression of TFF3 with a light microscope by two pathologists without knowledge of the samples associated clinicopathologic information. The sections were scored on the basis of the percentage of cells with staining relative to the background and the staining intensity. Firstly, the extent of staining was scored as 1 (< 33%), 2 (33%-67%), and 3 (> 67%) according to the percentage of the positive staining areas and staining intensity was scored as 1 (no stain or weak), 2 (medium), and 3 (strong). The sum of the extent and



intensity score was used as the staining score (1-6) for TFF3 expression. Scores of  $\leq 3$  was designated as negative expression and  $\geq 4$  was designated as positive expression. Furthermore, a statistical correlation of TFF3 expression in HCC with the clinicopathological parameters of HCC patients was analysed using the Spearman rank correlation according to procedures previously described [80].

### Cell culture and transfection

The human hepatocellular carcinoma cell lines Huh7, Hep3B, HepG2, and PLC\PRF5 were originally obtained from the American Type Culture Collection (Rockville, MD, USA). H2P and H2M cell lines were kindly provided by Dr. Chen from Cancer Science Institute of Singapore. Normal hepatocyte cell line LO2 was kindly provided by Institute of Biochemistry and Cell Biology, Chinese Academy of Sciences. All cell lines were cultured in DMEM (Hyclone, USA) supplemented with 10% heat-inactivated fetal bovine serum (FBS) (Hyclone, USA), 100 IU/mL penicillin and 100  $\mu$ g/mL streptomycin (Invitrogen, USA) as recommended.

Huh7, Hep3B and HepG2 cells with forced expression of TFF3 or siRNA-mediated depletion of TFF3 were transfected with FuGENE 6 transfection reagent (Promega, USA) as previously described [16]. Hep3B and Huh7 cells were transfected with pIRES-TFF3 or the empty vector (control). After G418 selection, the stable cell lines were obtained and designated as Hep3B-TFF3 and Hep3B-Vec or Huh7-TFF3 and Huh7-Vec respectively. Hep3B and HepG2 cells were transfected with pSilencer-siTFF3 or the empty vector (control). After Hygromycin B selection, the stable cell lines were obtained and designated as Hep3B-siTFF3 and Hep3B-siVec or HepG2-siTFF3 and HepG2-siVec respectively. Serum free media was mixed with FuGENE 6 transfection reagent and the respective plasmids for HCC cell transfection. After that, cell culture media was changed into selection media containing selection antibiotics. Selection media was replaced every 3 days until the formation of positive colonies was observed. After 4 weeks of selection, pooled stable transfectants were collected and expanded for cell function assays.

### mRNA and protein expression analysis

Total RNA was isolated from exponentially growing cells (70% confluence) using RNeasy mini Kit (Qiagen, Netherlands) according to by manufacturer's instruction. Real-time quantitative PCR (qPCR) was also performed to analyse mRNA expression levels [16]. Primer used for RT-PCR and qPCR are as previously described [81]. Protein expression was analysed using western blot by using the following antibodies: TFF3 (ab108599, 1:1000, Abcam); phospho-AKT1 S473 (ab66138, 1:2000, Abcam); pan-AKT (ab8805, 1:2000, Abcam);  $\beta$ -Actin (sc-47778, 1:10000, Santa Cruz), BCL-2 (sc-509, 1:5000, Santa Cruz), Bax (sc-70407, 1:5000, Santa Cruz). The secondary

anti-rabbit and anti-mouse horseradish peroxidase (HRP)-conjugated antibodies were purchased from Cell Signaling Technology. Proteins were visualized using the chemiluminescence ECL kit (SuperSignal West Pico substrate; Pierce, Rockford, IL) and read on ImageQuant system LAS500 (GE Healthcare).

### Oncogenicity assays

Cell proliferation was measured using total cell number, bromodeoxyuridine (BrdU) incorporation, and cell cycle analysis as previously described [16]. Apoptotic cell death was determined using Hoechst 33342 staining and Caspase-Glo caspase 3/7 kit (Promega) according to recommended protocols. Foci formation, colony formation in soft agar assay, three-dimensional Matrigel assay, transwell migration and invasion assays were performed as previously described [82]. Details of the experimental procedure can be found in Supplementary Material and Methods. All images were taken using bright field microscopy (Olympus, Tokyo, Japan).

### Generation of chemoresistance cells

The cytotoxic effects of chemotherapy drugs on the stable cells were measured using MTT assay. In a 96-well plate,  $5 \times 10^3$  cells were seeded per well and allowed to adhere overnight. After that, 200  $\mu$ l of media containing doxorubicin at different concentrations were added to the wells. After 72 h incubation, media was changed and MTT reagent was added to each well. The absorbance (450 nm and 650 nm) was measured using a microplate reader (Tecan, Infinite 200). The relative cell survival (%). measured by MTT was calculated by comparing the absorbance values (450 nm) of treated cells to untreated cells. The  $IC_{50}$  values of doxorubicin in the stable cells were analysed using nonlinear regression in GraphPad Prism 5.

To generate doxorubicin resistant cells, Hep3B cells were grown under selective pressure ( $IC_{50}$ ) for 3 days and subsequently for 3 days without doxorubicin. This cycle was repeated until we observed significant doxorubicin resistance in doxorubicin-treated Hep3B cells by assessing cell viability as previously described [80]. Resistant cells were maintained in media with  $IC_{50}$  concentration of doxorubicin (designated as Hep3B-Dox cells). The control cells during selection were cultured in medium containing DMSO (designated as Hep3B-Ctl cells).

### Doxorubicin efflux and accumulation assays

Doxorubicin efflux and accumulation assays were performed as previously described [83]. Cells were seeded in 24-well plates at  $5 \times 10^5$  cells per well until cell density reached 80% confluence. After that, cells were treated with 1  $\mu$ M doxorubicin for 2 hours and washed with PBS twice to remove doxorubicin. Cells were then incubated with doxorubicin-free media for up to 120 minutes.

Subsequently, the conditioned media were collected for analyzing doxorubicin efflux, and cell pellets were used to measure doxorubicin accumulation. The fluorescence intensities of both intracellularly accumulated and effluxed doxorubicin were measured using an excitation wavelength of 490 nm and emission wavelength of 570 nm using a fluorescence microplate reader (Tecan, Infinite 200).

### Spheroid formation assay

Cells were trypsinized and washed with serum free media. Harvested cells were filtered by cell strainer (40  $\mu$ m) to generate single cells, which were then suspended in serum-free cancer stem cell growth media. The CSC growth media used consists of serum-free DMEM/F12 (Hyclone) containing penicillin-streptomycin (Bio-west), 10 ng/ml recombinant human basic FGF (BD Biosciences), 20 ng/ml recombinant human EGF (Sigma-Aldrich), 2% B27 supplements (Gibco), 1% N2 supplement (Gibco) and 5  $\mu$ g/ml bovine insulin (Sigma-Aldrich). Cells were then plated in ultra-low attachment 6-well plates at a density of 5,000 cells/well or in ultra-low attachment 96-well plates at a density of 10 cells/well. Spheroid formation were observed and counted under microscope after 7 days in culture [84].

### ALDEFLUOR assay and Hoechst 33342 side population assay

The aldehyde dehydrogenase-positive cell population was measured using ALDEFLUOR kit (STEMCELL Technologies) according to the provided protocol. For side population assay, cells were trypsinized and collected by centrifugation at  $200 \times g$  for 5 minutes. The collected cells were incubated in DMEM media containing 2% FBS and 5  $\mu$ g/ml Hoechst 33342 for 90 minutes at 37°C. For control samples, ABC transporter inhibitor verapamil (Sigma-Aldrich) was added to cells at a final concentration of 50  $\mu$ M. After 30 minutes of incubation, cells were centrifuged at  $200 \times g$  for 5 minutes and suspended in 1 ml cold PBS. Cells were filtered through 40  $\mu$ m cell strainers to generate single-cell suspension for FACS analysis using FACS LSR II.

### Tumor xenograft analysis

Xenograft study was performed in accordance with a protocol approved by animal care and ethics committee of University of Science and Technology of China and that conformed to the legal mandate and national guidelines for the care and maintenance of laboratory animals. Hep3B-Vec, Hep3B-TFF3, Hep3B-siVec and Hep3B-siTFF3 cells ( $5 \times 10^6$ ) were injected subcutaneously into the left or right flanks of immunodeficient nude mice (Slac Laboratory Co, Shanghai, China). Each group consisted of six nude

mice. The tumor volumes were measured every 3-4 days after injection for 1 week. Tumor volume growth was measured over time by digital calipers, and the tumor volume in mm<sup>3</sup> is calculated by the formula: Volume = (width)<sup>2</sup>  $\times$  length/2. After six weeks, mice were sacrificed by CO<sub>2</sub> inhalation. The tumor tissues were resected for immunohistochemistry studies as described earlier [79].

### Statistics

Spearman rank correlation was used to test the association between TFF3 expression and clinicopathological features of HCC patients. The relationship of TFF3 expression and the overall survival or relapse free survival of HCC patients were analysed by Kaplan-Meier analyses, and the log-rank test was performed to analyse the statistical significance. All experiments were repeated at least 3 times. All numerical data were expressed as mean  $\pm$  S.E.M. and statistical significance was assessed by Student's t-test ( $P < 0.05$  was considered as significant) using Microsoft Excel unless otherwise indicated.

### ACKNOWLEDGMENTS

This work was funded by The key research and development program of China (2016YFC1302305), The National Natural Science Foundation of China (81502282, 81472494, 81272925) and The Cancer Science Institute through grants from The Ministry of Education, Singapore and National Research Foundation, Singapore and by a grant from the National Medical Research Council of Singapore [R-713-000-163-511 and R-713-000-163-511] and [R-713-000-206-511]. PEL was also supported by The Chinese Academy of Sciences President's International Fellowship Initiative (PIFI) Grant No. 2015VBA031.

### CONFLICTS OF INTEREST

PEL and TZ have previously consulted for Perseis Therapeutics Ltd. PEL is also named on PCT application numbers WO 2006/69253, WO/2008/042435, WO/2009/147530 and WO/2012/150869 and derivatives/national phase components of these applications thereof. MLY, YJC, QYC, MMW, VP, RMC, LL, LM and ZSW declare no conflicts of interest.

### REFERENCES

1. El-Serag HB, Rudolph KL. Hepatocellular carcinoma: epidemiology and molecular carcinogenesis. *Gastroenterology*. 2007; 132:2557-2576.
2. Pang RW, Poon RT. Cancer stem cell as a potential therapeutic target in hepatocellular carcinoma. *Curr Cancer Drug Targets*. 2012; 12:1081-1094.

3. Asghar U, Meyer T. Are there opportunities for chemotherapy in the treatment of hepatocellular cancer? *J Hepatol.* 2012; 56:686-695.
4. Baumann M, Krause M, Hill R. Exploring the role of cancer stem cells in radioresistance. *Nat Rev Cancer.* 2008; 8:545-554.
5. Dean M, Fojo T, Bates S. Tumor stem cells and drug resistance. *Nat Rev Cancer.* 2005; 5:275-284.
6. Welte Y, Adjaye J, Lehrach H, Regenbrecht C. Cancer stem cells in solid tumors: elusive or illusive? *Cell Commun Signal.* 2010; 8:6.
7. Yang XR, Xu Y, Yu B, Zhou J, Qiu SJ, Shi GM, Zhang BH, Wu WZ, Shi YH, Wu B, Yang GH, Ji Y, Fan J. High expression levels of putative hepatic stem/progenitor cell biomarkers related to tumor angiogenesis and poor prognosis of hepatocellular carcinoma. *Gut.* 2010; 59:953-962.
8. Yamashita T, Forgues M, Wang W, Kim JW, Ye Q, Jia H, Budhu A, Zanetti KA, Chen Y, Qin LX, Tang ZY, Wang XW. EpCAM and alpha-fetoprotein expression defines novel prognostic subtypes of hepatocellular carcinoma. *Cancer Res.* 2008; 68:1451-1461.
9. Ji J, Wang XW. Clinical implications of cancer stem cell biology in hepatocellular carcinoma. *Semin Oncol.* 2012; 39:461-472.
10. Ma S, Lee TK, Zheng BJ, Chan KW, Guan XY. CD133+ HCC cancer stem cells confer chemoresistance by preferential expression of the Akt/PKB survival pathway. *Oncogene.* 2008; 27:1749-1758.
11. Hu C, Li H, Li J, Zhu Z, Yin S, Hao X, Yao M, Zheng S, Gu J. Analysis of ABCG2 expression and side population identifies intrinsic drug efflux in the HCC cell line MHCC-97L and its modulation by Akt signaling. *Carcinogenesis.* 2008; 29:2289-2297.
12. Llovet JM, Ricci S, Mazzaferro V, Hilgard P, Gane E, Blanc JF, de Oliveira AC, Santoro A, Raoul JL, Forner A, Schwartz M, Porta C, Zeuzem S, et al. Sorafenib in advanced hepatocellular carcinoma. *N Engl J Med.* 2008; 359:378-390.
13. Yamashita T, Wang XW. Cancer stem cells in the development of liver cancer. *J Clin Invest.* 2013; 123:1911-1918.
14. Hoffmann W. Trefoil factors TFF (trefoil factor family) peptide-triggered signals promoting mucosal restitution. *Cell Mol Life Sci.* 2005; 62:2932-2938.
15. Im S, Yoo C, Jung JH, Choi HJ, Yoo J, Kang CS. Reduced expression of TFF1 and increased expression of TFF3 in gastric cancer: correlation with clinicopathological parameters and prognosis. *Int J Med Sci.* 2013; 10:133-140.
16. Kannan N, Kang J, Kong X, Tang J, Perry JK, Mohankumar KM, Miller LD, Liu ET, Mertani HC, Zhu T, Grandison PM, Liu DX, Lobie PE. Trefoil factor 3 is oncogenic and mediates anti-estrogen resistance in human mammary carcinoma. *Neoplasia.* 2010; 12:1041-1053.
17. Pandey V, Wu ZS, Zhang M, Li R, Zhang J, Zhu T, Lobie PE. Trefoil factor 3 promotes metastatic seeding and predicts poor survival outcome of patients with mammary carcinoma. *Breast Cancer Res.* 2014; 16:429.
18. Yio X, Zhang JY, Babyatsky M, Chen A, Lin J, Fan QX, Werther JL, Itzkowitz S. Trefoil factor family-3 is associated with aggressive behavior of colon cancer cells. *Clin Exp Metastasis.* 2005; 22:157-165.
19. Garraway IP, Seligson D, Said J, Horvath S, Reiter RE. Trefoil factor 3 is overexpressed in human prostate cancer. *Prostate.* 2004; 61:209-214.
20. Perera O, Evans A, Pertziger M, MacDonald C, Chen H, Liu DX, Lobie PE, Perry JK. Trefoil factor 3 (TFF3) enhances the oncogenic characteristics of prostate carcinoma cells and reduces sensitivity to ionising radiation. *Cancer Lett.* 2015; 361:104-111.
21. Lau WH, Pandey V, Kong X, Wang XN, Wu Z, Zhu T, Lobie PE. Trefoil Factor-3 (TFF3) Stimulates *De Novo* Angiogenesis in Mammary Carcinoma both Directly and Indirectly via IL-8/CXCR2. *PloS one.* 2015; 10:e0141947.
22. Thomsen KG, Lyng MB, Elias D, Vever H, Knoop AS, Lykkesfeldt AE, Laenkholm AV, Ditzel HJ. Gene expression alterations associated with outcome in aromatase inhibitor-treated ER+ early-stage breast cancer patients. *Breast Cancer Res Treat.* 2015; 154:483-494.
23. Chan MW, Chan VY, Leung WK, Chan KK, To KF, Sung JJ, Chan FK. Anti-sense trefoil factor family-3 (intestinal trefoil factor) inhibits cell growth and induces chemosensitivity to adriamycin in human gastric cancer cells. *Life Sci.* 2005; 76:2581-2592.
24. Taupin D, Wu DC, Jeon WK, Devaney K, Wang TC, Podolsky DK. The trefoil gene family are coordinately expressed immediate-early genes: EGF receptor- and MAP kinase-dependent interregulation. *J Clin Invest.* 1999; 103:R31-38.
25. Han Z, Hong L, Han Y, Wu K, Han S, Shen H, Li C, Yao L, Qiao T, Fan D. Phospho Akt mediates multidrug resistance of gastric cancer cells through regulation of P-gp, Bcl-2 and Bax. *Journal of experimental & clinical cancer research.* 2007; 26:261-268.
26. Taupin DR, Kinoshita K, Podolsky DK. Intestinal trefoil factor confers colonic epithelial resistance to apoptosis. *Proc Natl Acad Sci U S A.* 2000; 97:799-804.
27. Rivat C, Rodrigues S, Bruyneel E, Pietu G, Robert A, Redeuilh G, Bracke M, Gespach C, Attoub S. Implication of STAT3 signaling in human colonic cancer cells during intestinal trefoil factor 3 (TFF3)—and vascular endothelial growth factor-mediated cellular invasion and tumor growth. *Cancer Res.* 2005; 65:195-202.
28. Chen YH, Lu Y, De Plaen IG, Wang LY, Tan XD. Transcription factor NF-kappaB signals antianoinic function of trefoil factor 3 on intestinal epithelial cells. *Biochem Biophys Res Commun.* 2000; 274:576-582.

29. Chen X, Yamamoto M, Fujii K, Nagahama Y, Ooshio T, Xin B, Okada Y, Furukawa H, Nishikawa Y. Differential reactivation of fetal/neonatal genes in mouse liver tumors induced in cirrhotic and noncirrhotic conditions. *Cancer Sci.* 2015; 23:12700.
30. Franke TF. PI3K/Akt: getting it right matters. *Oncogene.* 2008; 27:6473-6488.
31. Khoury T, Chadha K, Javle M, Donohue K, Levea C, Iyer R, Okada H, Nagase H, Tan D. Expression of intestinal trefoil factor (TFF-3) in hepatocellular carcinoma. *Int J Gastrointest Cancer.* 2005; 35:171-177.
32. Okada H, Kimura MT, Tan D, Fujiwara K, Igarashi J, Makuuchi M, Hui AM, Tsurumaru M, Nagase H. Frequent trefoil factor 3 (TFF3) overexpression and promoter hypomethylation in mouse and human hepatocellular carcinomas. *Int J Oncol.* 2005; 26:369-377.
33. Shang YL, Qian YB. Clinical significance of expression of trefoil factor 3 in hepatocellular carcinoma. *World Chinese J Digestol.* 2014; :1141-1145.
34. Zhang X, Zhu T, Chen Y, Mertani HC, Lee KO, Lobie PE. Human growth hormone-regulated HOXA1 is a human mammary epithelial oncogene. *J Biol Chem.* 2003; 278:7580-7590.
35. Wolf BB, Schuler M, Echeverri F, Green DR. Caspase-3 is the primary activator of apoptotic DNA fragmentation via DNA fragmentation factor-45/inhibitor of caspase-activated DNase inactivation. *J Biol Chem.* 1999; 274:30651-30656.
36. Guadamillas MC, Cerezo A, Del Pozo MA. Overcoming anoikis - pathways to anchorage-independent growth in cancer. *J Cell Sci.* 2011; 124:3189-3197.
37. van Zijl F, Mikulits W. Hepatospheres: Three dimensional cell cultures resemble physiological conditions of the liver. *World J Hepatol.* 2010; 2:1-7.
38. Xiong Y, Hannon GJ, Zhang H, Casso D, Kobayashi R, Beach D. p21 is a universal inhibitor of cyclin kinases. *Nature.* 1993; 366:701-704.
39. Lewandowicz GM, Britt P, Elgie AW, Williamson CJ, Coley HM, Hall AG, Sargent JM. Cellular glutathione content, *in vitro* chemoresponse, and the effect of BSO modulation in samples derived from patients with advanced ovarian cancer. *Gynecol Oncol.* 2002; 85:298-304.
40. Raja SB, Murali MR, Devaraj H, Devaraj SN. Differential expression of gastric MUC5AC in colonic epithelial cells: TFF3-wired IL1 beta/Akt crosstalk-induced mucosal immune response against *Shigella dysenteriae* infection. *J Cell Sci.* 2012; 125:703-713.
41. Czabotar PE, Colman PM, Huang DC. Bax activation by Bim? *Cell Death Differ.* 2009; 16:1187-1191.
42. Lee J, Sung YH, Cheong C, Choi YS, Jeon HK, Sun W, Hahn WC, Ishikawa F, Lee HW. TERT promotes cellular and organismal survival independently of telomerase activity. *Oncogene.* 2008; 27:3754-3760.
43. Yau T, Chan P, Epstein R, Poon RT. Evolution of systemic therapy of advanced hepatocellular carcinoma. *World J Gastroenterol.* 2008; 14:6437-6441.
44. Zhang W, Yu J, Dong Q, Zhao H, Li F, Li H. A mutually beneficial relationship between hepatocytes and cardiomyocytes mitigates doxorubicin-induced toxicity. *Toxicol Lett.* 2014; 227:157-163.
45. Schinkel AH, Jonker JW. Mammalian drug efflux transporters of the ATP binding cassette (ABC) family: an overview. *Adv Drug Deliv Rev.* 2003; 55:3-29.
46. Chen Z, Shi T, Zhang L, Zhu P, Deng M, Huang C, Hu T, Jiang L, Li J. Mammalian drug efflux transporters of the ATP binding cassette (ABC) family in multidrug resistance: A review of the past decade. *Cancer Lett.* 2016; 370:153-164.
47. Cao L, Zhou Y, Zhai B, Liao J, Xu W, Zhang R, Li J, Zhang Y, Chen L, Qian H, Wu M, Yin Z. Sphere-forming cell subpopulations with cancer stem cell properties in human hepatoma cell lines. *BMC Gastroenterol.* 2011; 11:71.
48. Sharom FJ. ABC multidrug transporters: structure, function and role in chemoresistance. *Pharmacogenomics.* 2008; 9:105-127.
49. Ma S, Chan KW, Lee TK, Tang KH, Wo JY, Zheng BJ, Guan XY. Aldehyde dehydrogenase discriminates the CD133 liver cancer stem cell populations. *Mol Cancer Res.* 2008; 6:1146-1153.
50. Murar M, Vaidya A. Cancer stem cell markers: premises and prospects. *Biomark Med.* 2015; 9:1331-1342.
51. Zhou Z, Zhang L, Xie B, Wang X, Yang X, Ding N, Zhang J, Liu Q, Tan G, Feng D, Sun LQ. FOXC2 promotes chemoresistance in nasopharyngeal carcinomas via induction of epithelial mesenchymal transition. *Cancer Lett.* 2015; 363:137-145.
52. Oikawa T, Kamiya A, Zeniya M, Chikada H, Hyuck AD, Yamazaki Y, Wauthier E, Tajiri H, Miller LD, Wang XW, Reid LM, Nakauchi H. Sal-like protein 4 (SALL4), a stem cell biomarker in liver cancers. *Hepatology.* 2013; 57:1469-1483.
53. Mitchem JB, Brennan DJ, Knolhoff BL, Belt BA, Zhu Y, Sanford DE, Belaygorod L, Carpenter D, Collins L, Piwnica-Worms D, Hewitt S, Udipi GM, Gallagher WM, et al. Targeting tumor-infiltrating macrophages decreases tumor-initiating cells, relieves immunosuppression, and improves chemotherapeutic responses. *Cancer Res.* 2013; 73:1128-1141.
54. Chiba T, Miyagi S, Saraya A, Aoki R, Seki A, Morita Y, Yonemitsu Y, Yokosuka O, Taniguchi H, Nakauchi H, Iwama A. The polycomb gene product BMI1 contributes to the maintenance of tumor-initiating side population cells in hepatocellular carcinoma. *Cancer Res.* 2008; 68:7742-7749.
55. Korsmeyer SJ, Shutter JR, Veis DJ, Merry DE, Oltvai ZN. Bcl-2/Bax: a rheostat that regulates an anti-oxidant pathway and cell death. *Semin Cancer Biol.* 1993; 4:327-332.

56. Kinoshita K, Taupin DR, Itoh H, Podolsky DK. Distinct pathways of cell migration and antiapoptotic response to epithelial injury: structure-function analysis of human intestinal trefoil factor. *Mol Cell Biol.* 2000; 20:4680-4690.
57. Garrett CR, Coppola D, Wenham RM, Cubitt CL, Neuger AM, Frost TJ, Lush RM, Sullivan DM, Cheng JQ, Sebt SM. Phase I pharmacokinetic and pharmacodynamic study of tricirbine phosphate monohydrate, a small-molecule inhibitor of AKT phosphorylation, in adult subjects with solid tumors containing activated AKT. *Invest New Drugs.* 2011; 29:1381-1389.
58. Vestergaard EM, Nexø E, Tørring N, Borre M, Orntoft TF, Sørensen KD. Promoter hypomethylation and upregulation of trefoil factors in prostate cancer. *Int J Cancer.* 2010; 127:1857-1865.
59. Sun Q, Zhang Y, Liu F, Zhao X, Yang X. Identification of candidate biomarkers for hepatocellular carcinoma through pre-cancerous expression analysis in an HBx transgenic mouse. *Cancer Biol Ther.* 2007; 6:1532-1538.
60. Perry JK, Kannan N, Grandison PM, Mitchell MD, Lobie PE. Are trefoil factors oncogenic? *Trends Endocrinol Metab.* 2008; 19:74-81.
61. Aamann L, Vestergaard EM, Gronbaek H. Trefoil factors in inflammatory bowel disease. *World J Gastroenterol.* 2014; 20:3223-3230.
62. Yeo W, Mok TS, Zee B, Leung TW, Lai PB, Lau WY, Koh J, Mo FK, Yu SC, Chan AT, Hui P, Ma B, Lam KC, et al. A randomized phase III study of doxorubicin versus cisplatin/interferon alpha-2b/doxorubicin/fluorouracil (PIAF) combination chemotherapy for unresectable hepatocellular carcinoma. *J Natl Cancer Inst.* 2005; 97:1532-1538.
63. Johnstone RW, Ruefli AA, Lowe SW. Apoptosis: a link between cancer genetics and chemotherapy. *Cell.* 2002; 108:153-164.
64. Hong F, Nguyen VA, Shen X, Kunos G, Gao B. Rapid activation of protein kinase B/Akt has a key role in antiapoptotic signaling during liver regeneration. *Biochem Biophys Res Commun.* 2000; 279:974-979.
65. Pugazhenth S, Nesterova A, Sable C, Heidenreich KA, Boxer LM, Heasley LE, Reusch JE. Akt/protein kinase B up-regulates Bcl-2 expression through cAMP-response element-binding protein. *J Biol Chem.* 2000; 275:10761-10766.
66. Baus-Loncar M, Giraud AS. Multiple regulatory pathways for trefoil factor (TFF) genes. *Cell Mol Life Sci.* 2005; 62:2921-2931.
67. Ishizawa R, Parsons SJ. c-Src and cooperating partners in human cancer. *Cancer cell.* 2004; 6:209-214.
68. Liu H, Xu J, Zhou L, Yun X, Chen L, Wang S, Sun L, Wen Y, Gu J. Hepatitis B virus large surface antigen promotes liver carcinogenesis by activating the Src/PI3K/Akt pathway. *Cancer Res.* 2011; 71:7547-7557.
69. Abdullah LN, Chow EK. Mechanisms of chemoresistance in cancer stem cells. *Clin Transl Med.* 2013; 2:2001-1326.
70. Chiba T, Kita K, Zheng YW, Yokosuka O, Saisho H, Iwama A, Nakauchi H, Taniguchi H. Side population purified from hepatocellular carcinoma cells harbors cancer stem cell-like properties. *Hepatology.* 2006; 44:240-251.
71. Hirschmann-Jax C, Foster AE, Wulf GG, Nuchtern JG, Jax TW, Gobel U, Goodell MA, Brenner MK. A distinct "side population" of cells with high drug efflux capacity in human tumor cells. *Proc Natl Acad Sci U S A.* 2004; 101:14228-14233.
72. Borovski T, De Sousa EMF, Vermeulen L, Medema JP. Cancer stem cell niche: the place to be. *Cancer Res.* 2011; 71:634-639.
73. Fan QM, Jing YY, Yu GF, Kou XR, Ye F, Gao L, Li R, Zhao QD, Yang Y, Lu ZH, Wei LX. Tumor-associated macrophages promote cancer stem cell-like properties via transforming growth factor-beta1-induced epithelial-mesenchymal transition in hepatocellular carcinoma. *Cancer Lett.* 2014; 352:160-168.
74. Xia P, Xu XY. PI3K/Akt/mTOR signaling pathway in cancer stem cells: from basic research to clinical application. *Am J Cancer Res.* 2015; 5:1602-1609.
75. Gargini R, Cerliani JP, Escoll M, Anton IM, Wandosell F. Cancer stem cell-like phenotype and survival are coordinately regulated by Akt/FoxO/Bim pathway. *Stem cells (Dayton, Ohio).* 2015; 33:646-660.
76. Fletcher JI, Haber M, Henderson MJ, Norris MD. ABC transporters in cancer: more than just drug efflux pumps. *Nat Rev Cancer.* 2010; 10:147-156.
77. Januchowski R, Wojtowicz K, Zabel M. The role of aldehyde dehydrogenase (ALDH) in cancer drug resistance. *Biomed Pharmacother.* 2013; 67:669-680.
78. Vidal SJ, Rodriguez-Bravo V, Galsky M, Cordon-Cardo C, Domingo-Domenech J. Targeting cancer stem cells to suppress acquired chemotherapy resistance. *Oncogene.* 2014; 33:4451-4463.
79. Zhang M, Zhang W, Wu Z, Liu S, Sun L, Zhong Y, Zhang X, Kong X, Qian P, Zhang H, Lobie PE, Zhu T. Artemin is hypoxia responsive and promotes oncogenicity and increased tumor initiating capacity in hepatocellular carcinoma. *Oncotarget.* 2016; 7:3267-3282. doi: 10.18632/oncotarget.6572.
80. Wu ZS, Yang K, Wan Y, Qian PX, Perry JK, Chiesa J, Mertani HC, Zhu T, Lobie PE. Tumor expression of human growth hormone and human prolactin predict a worse survival outcome in patients with mammary or endometrial carcinoma. *J Clin Endocrinol Metab.* 2011; 96:E1619-1629.
81. Pandey V, Perry JK, Mohankumar KM, Kong XJ, Liu SM, Wu ZS, Mitchell MD, Zhu T, Lobie PE. Autocrine human growth hormone stimulates oncogenicity of endometrial carcinoma cells. *Endocrinology.* 2008; 149:3909-3919.

82. Zhu T, Starling-Emerald B, Zhang X, Lee KO, Gluckman PD, Mertani HC, Lobie PE. Oncogenic transformation of human mammary epithelial cells by autocrine human growth hormone. *Cancer Res.* 2005; 65:317-324.
83. Yoo BK, Chen D, Su ZZ, Gredler R, Yoo J, Shah K, Fisher PB, Sarkar D. Molecular mechanism of chemoresistance by astrocyte elevated gene-1. *Cancer Res.* 2010; 70:3249-3258.
84. Karimi-Busheri F, Zadorozhny V, Shawler DL, Fakhrai H. The stability of breast cancer progenitor cells during cryopreservation: Maintenance of proliferation, self-renewal, and senescence characteristics. *Cryobiology.* 2010; 60:308-314.
